# Supplementary material
Source: PubMed Central journal article supplement (PMC8848835)

# Supplementary Data

## SUPPLEMENTARY TABLE:

Supplementary table 1: Mass, assignment, and intensity of peaks in positive ion mode, the different classes observed are PE, Galcer, DAG, PC and Cer with different cationization. Cer-H<sub>2</sub>O, DAG-H<sub>2</sub>O and PA are reported in red as they can have multiple origins.

Supplementary table 2: Mass, assignment and intensity of peaks in negative ion mode, the different classes observed are PE, ST, PI and Galcer as deprotonated species, and SM-H-CH<sub>2</sub>. PA are reported in red as they can have multiple origins.

Supplementary table 3: Intensity and coefficient of variation from lipids peak in 4 successive tissue sections sorted by lipids class and cationization

## SUPPLEMENTARY FIGURE:

Supplementary figure 1: Positive ion mode spectra of lipid standards on rat brain tissue implanted with AgNP and MALDI images extracted from one of the major cationization.

Supplementary figure 2: Negative ion mode spectra of lipid standards on rat brain tissue implanted with AgNP and MALDI images extracted from deprotonated ion.

Supplementary figure 3: MALDI images in negative ion mode from deposited lipids on a rat brain section, the image has been extracted for the m/z 227.2006 corresponding to Mystic Acid(14:0)-H. This image shows that this peak can be produced by several lipid standards

Supplementary figure 4: MALDI images extracted for all lipids species identified in positive and negative ion mode. In positive ion mode all images shown are produced from silver cationization while in negative ion mode they are produced from M-H peak except for SM in which M-H-CH<sub>2</sub> was used.

Supplementary figure 5: MALDI average mass spectrum from a serial rat section, acquired in negative ion mode on a MALDI-LTQ-Orbitrap-XL with silver nanoparticles matrices.

Supplementary figure 6: Distribution of ceramides by mass imaging of a rat at brain section level -2.0 mm re:Bregma in positive ion mode and comparison of microscope image before and after Implantation.

Supplementary figure 7: Distribution of ceramides by mass imaging at level -3.2 mm re:Bregma in positive ion mode in a rat brain section, resolution 100,000 at 400 u.

**Supplementary table 1:** Mass, assignment, and intensity of peaks in positive ion mode, the different classes observed are PE, Galcer, DAG, PC and Cer with different cationization. Cer-H<sub>2</sub>O, DAG-H<sub>2</sub>O and PA are reported in red as they can have multiple origins.

| Assignments                                       | Theoretical m/z | m/z <sub>obs</sub> | Counts  | Error (ppm) |
|---------------------------------------------------|-----------------|--------------------|---------|-------------|
| Cer-H <sub>2</sub> O 16:0/d18:1 +Ag               | 626.4066        | 626.4067           | 4.0E+03 | 0.1         |
| Cer 16:0/d18:1+Ag                                 | 644.4166        | 644.4179           | 1.3E+03 | 2.0         |
| Cer-H <sub>2</sub> O 18:1/d18:1 or 18:0/d18:2 +Ag | 652.4223        | 652.4232           | 6.5E+04 | 1.4         |
| Cer-H <sub>2</sub> O 18:0/d18:1 +Ag               | 654.4379        | 654.4388           | 2.1E+05 | 1.4         |
| DAG-H <sub>2</sub> O 32a:1 +Ag                    | 655.3856        | 655.3864           | 1.3E+04 | 1.3         |
| DAG-H <sub>2</sub> O 32a:0 +Ag                    | 657.4012        | 657.4021           | 9.5E+04 | 1.3         |
| Cer 18:1/d18:1 or 18:0/d18:2+Ag                   | 670.4323        | 670.4335           | 6.5E+04 | 1.8         |
| Cer 18:0/d18:1+Ag                                 | 672.4479        | 672.4490           | 1.6E+05 | 1.6         |
| DAG 32a:0+Ag                                      | 675.4112        | 675.4127           | 4.6E+03 | 2.2         |
| DAG-H <sub>2</sub> O 34a:2 +Ag                    | 681.4012        | 681.4022           | 4.0E+04 | 1.5         |
| Cer-H <sub>2</sub> O 20:0/d18:1 +Ag               | 682.4692        | 682.4703           | 4.5E+04 | 1.6         |
| DAG-H <sub>2</sub> O 34a:1 +Ag                    | 683.4169        | 683.4177           | 7.3E+05 | 1.3         |
| DAG-H <sub>2</sub> O 34a:0 +Ag                    | 685.4325        | 685.4332           | 8.8E+04 | 1.0         |
| DAG 34a:2+Ag                                      | 699.4112        | 699.4128           | 1.3E+03 | 2.2         |
| Cer 20:0/d18:1+Ag                                 | 700.4792        | 700.4807           | 2.5E+04 | 2.1         |
| DAG 34a:1+Ag                                      | 701.4269        | 701.4284           | 4.4E+04 | 2.1         |
| DAG-H <sub>2</sub> O 36a:5 +Ag                    | 703.3856        | 703.3866           | 1.8E+03 | 1.4         |
| DAG-H <sub>2</sub> O 36a:4 +Ag                    | 705.4012        | 705.4025           | 9.4E+04 | 1.8         |
| Cholesterol+3Ag                                   | 707.0696        | 707.0718           | 5.5E+04 | 3.1         |
| DAG-H <sub>2</sub> O 36a:3 +Ag                    | 707.4169        | 707.4179           | 2.6E+04 | 1.5         |
| DAG-H <sub>2</sub> O 36a:2 +Ag                    | 709.4325        | 709.4337           | 1.2E+05 | 1.7         |
| Cer-H <sub>2</sub> O 22:0/d18:1 +Ag               | 710.5005        | 710.5016           | 8.2E+03 | 1.4         |
| DAG-H <sub>2</sub> O 36a:1 +Ag                    | 711.4482        | 711.4492           | 3.4E+05 | 1.5         |
| DAG-H <sub>2</sub> O 38p:6 +Ag                    | 713.4063        | 713.4076           | 3.8E+04 | 1.9         |
| DAG-H <sub>2</sub> O 36a:0 +Ag                    | 713.4638        | 713.4646           | 1.4E+05 | 1.0         |
| DAG-H <sub>2</sub> O 38e:6 +Ag                    | 715.4219        | 715.4231           | 3.3E+04 | 1.7         |
| DAG-H <sub>2</sub> O 38p:4 +Ag                    | 717.4376        | 717.4389           | 1.1E+05 | 1.8         |

| Assignments                                                    | Theoretical<br>m/z | m/z <sub>obs</sub> | Counts  | Error (ppm) |
|----------------------------------------------------------------|--------------------|--------------------|---------|-------------|
| DAG-H <sub>2</sub> O 38e:4+Ag                                  | 719.4532           | 719.4540           | 1.0E+04 | 1.0         |
| Cer-H <sub>2</sub> O 23:1/d 18:1+Ag                            | 722.5005           | 722.5016           | 2.9E+03 | 1.5         |
| Galcer 16:0/d 18:1+Na                                          | 722.5541           | 722.5544           | 1.7E+03 | 0.4         |
| DAG 36a:4+Ag                                                   | 723.4112           | 723.4126           | 3.3E+03 | 1.9         |
| DAG-H <sub>2</sub> O 38a:7+Ag                                  | 727.3856           | 727.3867           | 1.4E+03 | 1.5         |
| DAG 36a:2+Ag                                                   | 727.4425           | 727.4441           | 9.9E+03 | 2.1         |
| DAG-H <sub>2</sub> O 38a:6+Ag                                  | 729.4012           | 729.4026           | 1.2E+05 | 1.9         |
| DAG 36a:1+Ag                                                   | 729.4582           | 729.4597           | 4.8E+04 | 2.1         |
| DAG-H <sub>2</sub> O 38a:5+Ag                                  | 731.4169           | 731.4181           | 8.8E+04 | 1.7         |
| CE 16:0                                                        | 731.4896           | 731.4905           | 6.4E+02 | 1.1         |
| DAG-H <sub>2</sub> O 38a:4+Ag                                  | 733.4325           | 733.4338           | 4.2E+05 | 1.7         |
| Cer-H <sub>2</sub> O 24:1/d 18:2+Ag                            | 734.5005           | 734.5018           | 2.0E+04 | 1.7         |
| DAG-H <sub>2</sub> O 38a:3+Ag                                  | 735.4482           | 735.4492           | 9.6E+04 | 1.4         |
| Cer-H <sub>2</sub> O 24:1/d 18:1 or 24:0/d 18:2+Ag             | 736.5162           | 736.5175           | 1.3E+05 | 1.8         |
| DAG-H <sub>2</sub> O 38a:2+Ag                                  | 737.4638           | 737.4647           | 3.1E+04 | 1.3         |
| Cer-H <sub>2</sub> O 24:0/d 18:1+Ag                            | 738.5318           | 738.5330           | 3.1E+04 | 1.7         |
| DAG-H <sub>2</sub> O 38a:1+Ag                                  | 739.4795           | 739.4796           | 3.6E+04 | 0.1         |
| DAG-H <sub>2</sub> O 40p:6+Ag                                  | 741.4376           | 741.4390           | 1.3E+05 | 1.9         |
| DAG-H <sub>2</sub> O 38a:0+Ag                                  | 741.4951           | 741.4960           | 3.1E+04 | 1.2         |
| DAG-H <sub>2</sub> O 40e:6+Ag                                  | 743.4532           | 743.4542           | 2.1E+04 | 1.4         |
| DAG 38a:6+Ag                                                   | 747.4112           | 747.4130           | 7.7E+03 | 2.4         |
| Galcer 18:0/d 18:1+Na                                          | 750.5854           | 750.5870           | 7.9E+03 | 2.1         |
| DAG 38a:4+Ag                                                   | 751.4425           | 751.4441           | 6.5E+04 | 2.1         |
| Cer 24:1/d 18:2+Ag or Cer-H <sub>2</sub> O 24:1(OH)/d 18:1 +Ag | 752.5105           | 752.5125           | 5.8E+04 | 2.6         |
| Cer 24:1/d 18:1+Ag or Cer-H <sub>2</sub> O 24:0(OH)/d 18:1 +Ag | 754.5262           | 754.5280           | 1.2E+05 | 2.3         |
| DAG-H <sub>2</sub> O 40a:7+Ag                                  | 755.4169           | 755.4181           | 3.7E+04 | 1.7         |
| Cer 24:0/d 18:1+Ag                                             | 756.5418           | 756.5443           | 1.0E+04 | 3.3         |

| Assignments                   | Theoretical<br>m/z | m/z <sub>obs</sub> | Counts  | Error (ppm) |
|-------------------------------|--------------------|--------------------|---------|-------------|
| PC 32:0a+Na                   | 756.5514           | 756.5517           | 1.2E+04 | 0.4         |
| DAG-H <sub>2</sub> O 40a:6+Ag | 757.4325           | 757.4336           | 5.2E+05 | 1.4         |
| CE 18:1                       | 757.5053           | 757.5058           | 1.5E+03 | 0.7         |
| DAG-H <sub>2</sub> O 40a:5+Ag | 759.4482           | 759.4491           | 1.2E+05 | 1.2         |
| DAG-H <sub>2</sub> O 40a:4+Ag | 761.4638           | 761.4649           | 8.6E+04 | 1.4         |
| DAG-H <sub>2</sub> O 40a:3+Ag | 763.4795           | 763.4800           | 3.5E+04 | 0.7         |
| Galcer 18:0/d18:1+K           | 766.5594           | 766.5607           | 4.4E+03 | 1.7         |
| PC 32a:0+K                    | 772.5253           | 772.5251           | 4.4E+04 | -0.3        |
| DAG 40a:6+Ag                  | 775.4425           | 775.4443           | 4.6E+04 | 2.3         |
| PE 34p:1-H+2K                 | 778.4550           | 778.4565           | 3.5E+04 | 1.9         |
| PE 34a:1-H+Na+K               | 778.4760           | 778.4776           | 6.8E+03 | 2.1         |
| Galcer 20:0/d18:1+Na          | 778.6167           | 778.6181           | 1.7E+03 | 1.7         |
| CE 20:4                       | 779.4896           | 779.4902           | 1.1E+04 | 0.7         |
| PC 34a:1+Na                   | 782.5670           | 782.5685           | 2.1E+04 | 1.8         |
| PE 36p:4-H+Na+K               | 784.4654           | 784.4668           | 8.5E+02 | 1.7         |
| PC 34a:0+Na                   | 784.5827           | 784.5834           | 4.8E+02 | 0.9         |
| PE 36e:4-H+Na+K               | 786.4810           | 786.4827           | 5.4E+02 | 2.1         |
| PE 36p:1-H+Na+K               | 790.5124           | 790.5143           | 2.1E+04 | 2.5         |
| PE 36p:0-H+Na+K               | 792.5280           | 792.5300           | 6.5E+02 | 2.5         |
| PE34a:1-H+2K                  | 794.4499           | 794.4518           | 3.2E+04 | 2.4         |
| Galcer 20:0/d18:1+K           | 794.5907           | 794.5919           | 6.7E+02 | 1.5         |
| Galcer 20:0(OH)/d18:1+Na      | 794.6117           | 794.6129           | 6.3E+02 | 1.5         |
| PC 34a:2+K                    | 796.5253           | 796.5258           | 8.9E+02 | 0.6         |
| PC 34a:1+K                    | 798.5410           | 798.5426           | 7.4E+04 | 2.0         |
| PE 36p:4-H+2K                 | 800.4393           | 800.4414           | 5.1E+03 | 2.5         |
| PE 36a:4-H+Na+K               | 800.4603           | 800.4618           | 5.4E+02 | 1.9         |
| PC 34a:0+K                    | 800.5566           | 800.5576           | 4.9E+03 | 1.2         |

| Assignments                                | Theoretical<br>m/z | m/z <sub>obs</sub> | Counts  | Error (ppm) |
|--------------------------------------------|--------------------|--------------------|---------|-------------|
| PA 38:4-H+2K                               | 801.4233           | 801.4248           | 3.3E+04 | 1.8         |
| CE 22:6                                    | 803.4896           | 803.4905           | 4.3E+03 | 1.1         |
| PE 36p:2-H+2K                              | 804.4706           | 804.4726           | 4.4E+04 | 2.5         |
| PE 36a:2-H+Na+K                            | 804.4916           | 804.4936           | 2.1E+04 | 2.5         |
| Galcer 22:1/d18:1 or 22:0/d18:2+Na         | 804.6324           | 804.6340           | 4.6E+02 | 2.0         |
| Galcer 16:0/d18:1+Ag                       | 806.4695           | 806.4709           | 2.4E+03 | 1.8         |
| PE 36p:1-H+2K                              | 806.4863           | 806.4883           | 5.8E+04 | 2.5         |
| PE 36a:1-H+Na+K                            | 806.5073           | 806.5093           | 5.9E+04 | 2.5         |
| Galcer 22:0/d18:1+Na                       | 806.6480           | 806.6495           | 3.1E+03 | 1.8         |
| PE 38p:6-H+Na+K                            | 808.4654           | 808.4672           | 5.3E+03 | 2.3         |
| PE 36p:0-H+2K                              | 808.5019           | 808.5037           | 5.4E+03 | 2.2         |
| PE 36a:0-H+Na+K                            | 808.5229           | 808.5238           | 1.5E+03 | 1.1         |
| PE 38p:5-H+Na+K                            | 810.4811           | 810.4826           | 1.6E+03 | 1.9         |
| Galcer 20:0(OH)/d18:1+K                    | 810.5856           | 810.5886           | 4.8E+02 | 3.7         |
| PC 36a:1+Na                                | 810.5983           | 810.5993           | 1.0E+03 | 1.2         |
| PE 38p:4-H+Na+K                            | 812.4967           | 812.4987           | 1.7E+04 | 2.4         |
| PE 36a:4-H+2K                              | 816.4343           | 816.4361           | 3.1E+03 | 2.2         |
| PE 36a:2-H+2K                              | 820.4656           | 820.4676           | 4.8E+04 | 2.5         |
| PC 36a:4+K                                 | 820.5253           | 820.5257           | 2.7E+03 | 0.4         |
| Galcer 22:1(OH)/d18:1 or 22:0(OH)/d18:2+Na | 820.6273           | 820.6289           | 4.5E+03 | 1.9         |
| PE 36a:1-H+2K                              | 822.4812           | 822.4833           | 1.6E+05 | 2.5         |
| Galcer 22:0/d18:1+K                        | 822.6220           | 822.6237           | 1.7E+03 | 2.1         |
| Galcer 22:0(OH)/d18:1+Na                   | 822.6430           | 822.6449           | 6.5E+04 | 2.3         |
| PE 38p:6-H+2K                              | 824.4393           | 824.4413           | 2.0E+04 | 2.4         |
| PE 38a:6-H+Na+K                            | 824.4603           | 824.4622           | 9.8E+03 | 2.3         |
| PE 36a:0-H+2K                              | 824.4969           | 824.4971           | 7.6E+03 | 0.3         |
| PA40:6-H+2K                                | 825.4234           | 825.4255           | 7.5E+04 | 2.6         |

| Assignments                       | Theoretical<br>m/z | m/z <sub>obs</sub> | Counts  | Error (ppm) |
|-----------------------------------|--------------------|--------------------|---------|-------------|
| PE 38p:5-H+2K                     | 826.4550           | 826.4572           | 8.8E+03 | 2.7         |
| PE 38a:5-H+Na+K                   | 826.4760           | 826.4780           | 2.1E+03 | 2.5         |
| PC 36a:1+K                        | 826.5723           | 826.5739           | 1.1E+04 | 1.9         |
| PE 38p:4-H+2K                     | 828.4706           | 828.4729           | 5.7E+04 | 2.7         |
| PE 38a:4-H+Na+K                   | 828.4916           | 828.4936           | 4.5E+04 | 2.4         |
| PE 38e:4-H+2K                     | 830.4863           | 830.4885           | 4.2E+03 | 2.7         |
| PE 40a:6+K                        | 830.5097           | 830.5111           | 1.3E+04 | 1.8         |
| Galcer 24:1/d18:2+Na              | 830.6480           | 830.6498           | 5.4E+03 | 2.1         |
| PA 38:4+Ag                        | 831.4089           | 831.4098           | 1.5E+04 | 1.1         |
| Galcer 18:1/d18:1or 18:0/d18:2+Ag | 832.4851           | 832.4870           | 3.0E+03 | 2.2         |
| Galcer 24:1/d18:1or 24:0/d18:2+Na | 832.6637           | 832.6657           | 6.4E+04 | 2.4         |
| Galcer 18:0/d18:1+Ag              | 834.5008           | 834.5027           | 5.9E+04 | 2.3         |
| Galcer 23:1(OH)/d18:1+Na          | 834.6430           | 834.6443           | 4.2E+02 | 1.6         |
| Galcer 24:0/d18:1+Na              | 834.6793           | 834.6812           | 2.3E+04 | 2.2         |
| Galcer 22:1(OH)/d18:1+K           | 836.6012           | 836.6028           | 1.6E+03 | 1.9         |
| Galcer 23:0(OH)/d18:1+Na          | 836.6586           | 836.6604           | 1.6E+04 | 2.1         |
| Galcer C22:0(OH)/d18:1+K          | 838.6169           | 838.6188           | 4.9E+04 | 2.2         |
| PE 38a:6-H+2K                     | 840.4343           | 840.4364           | 4.1E+04 | 2.6         |
| PC 32a:0+Ag                       | 840.4667           | 840.4684           | 2.2E+04 | 2.1         |
| PE 38a:5-H+2K                     | 842.4499           | 842.4521           | 1.3E+04 | 2.6         |
| PE 38a:4-H+2K                     | 844.4656           | 844.4678           | 1.3E+05 | 2.7         |
| PA 36:2-H+AgK                     | 845.3647           | 845.3667           | 1.8E+04 | 2.3         |
| PE 34p:1-H+AgK                    | 846.3964           | 846.3983           | 2.2E+04 | 2.3         |
| Galcer 24:1/d18:2+K               | 846.6220           | 846.6237           | 2.1E+03 | 2.0         |
| Galcer 24:1(OH)/d18:2+Na          | 846.6430           | 846.6447           | 6.2E+03 | 2.1         |
| PA 36:1-H+AgK                     | 847.3804           | 847.3822           | 3.1E+04 | 2.2         |
| PC 38a:4+K                        | 848.5566           | 848.5579           | 6.5E+02 | 1.5         |

| Assignments                                | Theoretical<br>m/z | m/z <sub>obs</sub> | Counts  | Error (ppm) |
|--------------------------------------------|--------------------|--------------------|---------|-------------|
| Galcer 24:1/d18:1 or 24:0/d18:2+K          | 848.6376           | 848.6396           | 4.9E+04 | 2.3         |
| Galcer 24:1(OH)/d18:1 or 24:0(OH)/d18:2+Na | 848.6586           | 848.6606           | 1.1E+05 | 2.3         |
| PE 40p:7-H+2K                              | 850.4550           | 850.4566           | 3.7E+03 | 1.9         |
| PE 40a:7-H+Na+K                            | 850.4760           | 850.4781           | 5.9E+03 | 2.5         |
| Galcer 18:0(OH)/d18:1+Ag                   | 850.4957           | 850.4976           | 2.5E+04 | 2.3         |
| Galcer 24:0/d18:1+K                        | 850.6533           | 850.6558           | 1.6E+04 | 3.0         |
| Galcer 24:0(OH)/d18:1+Na                   | 850.6743           | 850.6761           | 1.6E+05 | 2.2         |
| PE 40p:6-H+2K                              | 852.4706           | 852.4731           | 8.1E+04 | 2.8         |
| PE 40a:6-H+Na+K                            | 852.4916           | 852.4937           | 7.5E+04 | 2.5         |
| Galcer 23:0(OH)/d18:1+K                    | 852.6325           | 852.6343           | 9.3E+03 | 2.0         |
| PE 40p:5-H+2K                              | 854.4863           | 854.4888           | 8.8E+03 | 2.9         |
| PA 40:6+Ag                                 | 855.4089           | 855.4106           | 2.0E+04 | 2.0         |
| PE 40p:4-H+2K                              | 856.5019           | 856.5041           | 1.6E+04 | 2.5         |
| PE 40a:4-H+Na+K                            | 856.5229           | 856.5248           | 5.6E+03 | 2.2         |
| PE 40e:4-H+2K                              | 858.5176           | 858.5198           | 6.3E+02 | 2.6         |
| Galcer 20:0/d18:2+Ag                       | 860.5164           | 860.5181           | 1.5E+03 | 2.0         |
| PE 34a:1-H+AgK                             | 862.3913           | 862.3932           | 1.0E+04 | 2.2         |
| Galcer 20:0/d18:1+Ag                       | 862.5321           | 862.5339           | 2.5E+04 | 2.1         |
| Galcer 24:1(OH)/d18:2+K                    | 862.6169           | 862.6183           | 2.0E+03 | 1.6         |
| Ag cluster(8)                              | 863.2388           | 863.2413           | 8.5E+03 | 2.9         |
| Galcer 24:1(OH)/d18:1 or 24:0(OH)/d18:2+K  | 864.6325           | 864.6345           | 7.9E+04 | 2.3         |
| PE 40a:7-H+2K                              | 866.4499           | 866.4519           | 2.4E+04 | 2.3         |
| PC 34a:1+Ag                                | 866.4824           | 866.4841           | 4.2E+04 | 2.0         |
| Galcer 24:0(OH)/d18:1+K                    | 866.6482           | 866.6501           | 1.2E+05 | 2.2         |
| PE 36p:4-H+AgK                             | 868.3807           | 868.3828           | 3.3E+03 | 2.4         |
| PE 40a:6-H+2K                              | 868.4656           | 868.4678           | 2.2E+05 | 2.6         |
| PC 34a:0+Ag                                | 868.4980           | 868.4985           | 2.5E+03 | 0.6         |

| Assignments                                | Theoretical<br>m/z | m/z <sub>obs</sub> | Counts  | Error (ppm) |
|--------------------------------------------|--------------------|--------------------|---------|-------------|
| PA 38:4-H+AgK                              | 869.3647           | 869.3664           | 2.0E+04 | 1.9         |
| PE 36e:4-H+AgK                             | 870.3964           | 870.3979           | 7.6E+02 | 1.7         |
| PE 38a:6+Ag                                | 870.4198           | 870.4208           | 7.4E+02 | 1.3         |
| Galcer 20:4(OH)/d18:1+Ag                   | 870.4644           | 870.4655           | 1.4E+04 | 1.3         |
| PE 40a:5-H+2K                              | 870.4812           | 870.4820           | 1.2E+04 | 1.0         |
| PE 36p:2-H+AgK                             | 872.4120           | 872.4138           | 3.2E+04 | 2.1         |
| PE 40a:4-H+2K                              | 872.4968           | 872.4989           | 2.9E+04 | 2.4         |
| PE 36p:1-H+AgK                             | 874.4277           | 874.4293           | 3.8E+04 | 1.9         |
| Galcer 20:0(OH)/d18:2+Ag                   | 876.5113           | 876.5130           | 6.5E+02 | 2.0         |
| Galcer 20:0(OH)/d18:1+Ag                   | 878.5270           | 878.5288           | 1.6E+04 | 2.1         |
| PC 40a:3+K                                 | 878.6036           | 878.6037           | 2.1E+03 | 0.1         |
| 2 Cholesterol+Ag                           | 879.6143           | 879.6162           | 4.4E+04 | 2.2         |
| PE 40p:6+Ag                                | 882.4561           | 882.4573           | 5.1E+03 | 1.4         |
| PE 36a:4-H+AgK                             | 884.3756           | 884.3777           | 1.4E+03 | 2.4         |
| Galcer 22:1/d18:2+Ag                       | 886.5321           | 886.5336           | 1.2E+03 | 1.7         |
| PE 36a:2-H+AgK                             | 888.4069           | 888.4091           | 2.4E+04 | 2.4         |
| PC 36a:4+Ag                                | 888.4667           | 888.4669           | 5.4E+02 | 0.2         |
| Galcer 22:1/d18:1 or 22:0/d18:2+Ag         | 888.5477           | 888.5498           | 3.7E+04 | 2.3         |
| PE 36a:1-H+AgK                             | 890.4226           | 890.4246           | 6.2E+04 | 2.3         |
| Galcer 22:0/d18:1+Ag                       | 890.5634           | 890.5652           | 3.4E+04 | 2.1         |
| PE 38p:6-H+AgK                             | 892.3807           | 892.3828           | 1.6E+04 | 2.3         |
| PA40:6-H+AgK                               | 893.3647           | 893.3670           | 5.3E+04 | 2.5         |
| PE 38p:5-H+AgK                             | 894.3964           | 894.3983           | 6.3E+03 | 2.1         |
| PE 38p:4-H+AgK                             | 896.4120           | 896.4141           | 4.4E+04 | 2.3         |
| PE 40a:6+Ag                                | 898.4511           | 898.4525           | 1.3E+04 | 1.6         |
| Galcer 23:1/d18:1 or 23:0/d18:2+Ag         | 902.5634           | 902.5658           | 6.6E+03 | 2.7         |
| Galcer 22:1(OH)/d18:1 or 22:0(OH)/d18:2+Ag | 904.5426           | 904.5457           | 6.5E+04 | 3.4         |



| Assignments                                | Theoretical<br>m/z | m/z <sub>obs</sub> | Counts  | Error (ppm) |
|--------------------------------------------|--------------------|--------------------|---------|-------------|
| Galcer 23:0/d18:1+Ag                       | 904.5790           | 904.5806           | 3.0E+03 | 1.7         |
| Galcer 22:0(OH)/d18:1+Ag                   | 906.5583           | 906.5602           | 2.7E+05 | 2.1         |
| PE 38a:6-H+AgK                             | 908.3756           | 908.3777           | 2.8E+04 | 2.3         |
| PE 38a:5-H+AgK                             | 910.3913           | 910.3926           | 7.4E+03 | 1.4         |
| PE 38a:4-H+AgK                             | 912.4069           | 912.4092           | 8.6E+04 | 2.5         |
| Galcer 24:1/d18:2+Ag                       | 914.5634           | 914.5653           | 7.2E+04 | 2.1         |
| Galcer 24:1/d18:1or 24:0/d18:2+Ag          | 916.5790           | 916.5810           | 3.4E+05 | 2.1         |
| PE 40p:7-H+AgK                             | 918.3964           | 918.3983           | 3.3E+03 | 2.1         |
| Galcer 24:0/d18:1+Ag                       | 918.5947           | 918.5966           | 1.0E+05 | 2.1         |
| PE 40p:6-H+AgK                             | 920.4120           | 920.4141           | 6.7E+04 | 2.3         |
| Galcer 23:0(OH)/d18:1+Ag                   | 920.5739           | 920.5763           | 8.0E+04 | 2.5         |
| PE 40p:4-H+AgK                             | 924.4433           | 924.4448           | 1.2E+04 | 1.6         |
| PE 40e:4-H+AgK                             | 926.4590           | 926.4625           | 8.8E+02 | 3.8         |
| Galcer 24:1(OH)/d18:2+Ag                   | 930.5583           | 930.5604           | 4.1E+04 | 2.2         |
| Galcer 25:1/d18:1 or 25:0/18:2+Ag          | 930.5947           | 930.5964           | 1.9E+03 | 1.9         |
| Galcer 24:1(OH)/d18:1 or 24:0(OH)/d18:2+Ag | 932.5739           | 932.5758           | 4.5E+05 | 2.0         |
| PE 40a:7-H+AgK                             | 934.3913           | 934.3934           | 1.8E+04 | 2.2         |
| Galcer 24:0(OH)/d18:1+Ag                   | 934.5896           | 934.5910           | 7.0E+05 | 1.5         |
| PE40a:6-H+AgK                              | 936.4069           | 936.4090           | 1.5E+05 | 2.2         |
| PE40a:4-H+AgK                              | 940.4382           | 940.4400           | 1.5E+04 | 1.9         |

Supplementary table 2: Mass, assignment and intensity of peaks in negative ion mode, the different classes observed are PE, ST, PI and Galcer as deprotonated species, and SM-H-CH<sub>2</sub>. PA are reported in red as they can have multiple origins

| Assignments                                    | Theoretical m/z | m/z <sub>obs</sub> | Counts  | Error (ppm) |
|------------------------------------------------|-----------------|--------------------|---------|-------------|
| PA 34:1-H                                      | 673.4814        | 673.4791           | 7.4E+04 | -3.3        |
| SM 16:0/d18:1-H-CH <sub>2</sub>                | 687.5441        | 687.5424           | 6.2E+03 | -2.4        |
| PA 36:2-H                                      | 699.4970        | 699.4946           | 6.1E+04 | -3.4        |
| PE 34p:1-H                                     | 700.5287        | 700.5258           | 8.5E+04 | -4.1        |
| PA 36:1-H                                      | 701.5127        | 701.5118           | 5.9E+04 | -1.3        |
| SM 18:1/d18:1 or 18:0/d18:2 -H-CH <sub>2</sub> | 713.5592        | 713.5585           | 5.0E+03 | -1.0        |
| SM 18:0/d18:1-H-CH <sub>2</sub>                | 715.5749        | 715.5735           | 1.7E+05 | -1.9        |
| PE 34a:1-H                                     | 716.5236        | 716.5214           | 4.3E+04 | -3.1        |
| PE 34a:0-H                                     | 718.5392        | 718.5369           | 1.2E+05 | -3.2        |
| PA 38:5-H                                      | 721.4814        | 721.4801           | 1.3E+03 | -1.7        |
| PE 36p:4-H                                     | 722.5130        | 722.5102           | 2.3E+04 | -3.9        |
| PA 38:4-H                                      | 723.4970        | 723.4954           | 1.7E+04 | -2.2        |
| PE 36p:2-H                                     | 726.5443        | 726.5419           | 9.2E+04 | -3.4        |
| PE 36p:1-H                                     | 728.5600        | 728.5578           | 9.2E+04 | -3.0        |
| PE 36p:0-H                                     | 730.5756        | 730.5727           | 4.3E+03 | -4.0        |
| PE 36a:4-H                                     | 738.5079        | 738.5057           | 4.0E+03 | -3.0        |
| SM 20:1/d18:1 or 20:0/d18:2 -H-CH <sub>2</sub> | 741.5910        | 741.5892           | 1.2E+03 | -2.5        |
| PE 36a:2-H                                     | 742.5392        | 742.5368           | 7.4E+04 | -3.3        |
| SM 20:0/d18:1-H-CH <sub>2</sub>                | 743.6067        | 743.6048           | 7.6E+03 | -2.5        |
| PE 36a:1-H                                     | 744.5549        | 744.5524           | 2.6E+05 | -3.3        |
| PE 38p:6-H                                     | 746.5130        | 746.5104           | 6.5E+04 | -3.6        |
| PE 36a:0-H                                     | 746.5705        | 746.5682           | 1.2E+04 | -3.1        |
| PA 40:6-H                                      | 747.4970        | 747.4941           | 6.9E+04 | -3.9        |
| PE 38p:4-H                                     | 750.5443        | 750.5418           | 8.9E+04 | -3.3        |
| PE 38p:2-H                                     | 754.5756        | 754.5730           | 4.3E+03 | -3.5        |
| PE 38a:6-H                                     | 762.5079        | 762.5053           | 6.9E+04 | -3.5        |
| PE 38a:5-H                                     | 764.5236        | 764.5213           | 2.1E+04 | -3.0        |

| Assignments                                    | Theoretical<br>m/z | m/z <sub>obs</sub> | Counts  | Error (ppm) |
|------------------------------------------------|--------------------|--------------------|---------|-------------|
| PE 38a:4-H                                     | 766.5392           | 766.5369           | 1.9E+05 | -3.1        |
| SM 22:1/d18:1 or 22:0/d18:2 -H-CH <sub>2</sub> | 769.6223           | 769.6203           | 2.2E+03 | -2.6        |
| PE 38a:2-H                                     | 770.5705           | 770.5678           | 2.5E+03 | -3.5        |
| SM 22:0/d18:1-H-CH <sub>2</sub>                | 771.6380           | 771.6360           | 4.7E+03 | -2.7        |
| PE 40p:7-H                                     | 772.5287           | 772.5260           | 9.1E+03 | -3.5        |
| PE 38a:1-H                                     | 772.5862           | 772.5836           | 3.7E+04 | -3.4        |
| PE 40p:6-H                                     | 774.5443           | 774.5418           | 1.3E+05 | -3.2        |
| PE 40p:4-H                                     | 778.5756           | 778.5733           | 1.2E+04 | -3.0        |
| PE 40a:7-H                                     | 788.5236           | 788.5205           | 4.2E+04 | -3.8        |
| PE 40a:6-H                                     | 790.5392           | 790.5365           | 2.2E+05 | -3.4        |
| PE 40a:4-H                                     | 794.5705           | 794.5681           | 2.3E+04 | -3.0        |
| SM 24:1/d18:1 or 24:0/d18:2 -H-CH <sub>2</sub> | 797.6536           | 797.6516           | 1.5E+03 | -2.6        |
| SM 24:0/d18:1-H-CH <sub>2</sub>                | 799.6693           | 799.6671           | 1.5E+03 | -2.7        |
| ST 18:1/d18:1 or 18:0/d18:2 -H                 | 804.5301           | 804.5275           | 4.9E+03 | -3.3        |
| ST 18:0/d18:1-H                                | 806.5458           | 806.5433           | 1.3E+05 | -3.1        |
| PA 34:1-H+AgCl                                 | 815.3548           | 815.3538           | 8.3E+02 | -1.2        |
| ST 18:0(OH)/d18:1-H                            | 822.5407           | 822.5424           | 1.9E+04 | 2.1         |
| GalCer 24:1(OH)/d18:1 or 24:0(OH)/d18:2-H      | 824.6621           | 824.6589           | 7.7E+02 | -3.8        |
| GalCer 24:0(OH)/d18:1-H                        | 826.6778           | 826.6748           | 3.1E+03 | -3.6        |
| ST 20:0/d18:1-H                                | 834.5771           | 834.5746           | 3.1E+03 | -3.0        |
| ST 20:0(OH)/d18:1-H                            | 850.5720           | 850.5692           | 1.0E+03 | -3.3        |
| PI 36:4-H                                      | 857.5186           | 857.5151           | 7.0E+04 | -4.1        |
| PE 34a:0-H+AgCl                                | 860.4126           | 860.4137           | 2.7E+03 | 1.2         |
| ST 22:1/d18:1 or 22:0/d18:2-H                  | 860.5927           | 860.5901           | 4.6E+03 | -3.0        |
| ST C22:0/d18:1-H                               | 862.6084           | 862.6058           | 2.2E+04 | -3.0        |
| PE36p:2-H+AgCl                                 | 868.4177           | 868.4164           | 8.2E+02 | -1.5        |
| ST 22:1(OH)/d18:1 or 22:0(OH)/d18:2 -H         | 876.5876           | 876.5867           | 6.2E+03 | -1.0        |

| Assignments                           | Theoretical<br>m/z | m/z <sub>obs</sub> | Counts  | Error (ppm) |
|---------------------------------------|--------------------|--------------------|---------|-------------|
| ST 22:0(OH)/d18:1-H                   | 878.6033           | 878.6006           | 6.6E+04 | -3.1        |
| PI 38:6-H                             | 881.5186           | 881.5159           | 1.4E+03 | -3.1        |
| PI 38:5-H                             | 883.5342           | 883.5314           | 3.8E+04 | -3.1        |
| PE 36a:2-H+AgCl                       | 884.4126           | 884.4122           | 4.4E+02 | -0.4        |
| PI 38:4-H                             | 885.5499           | 885.5473           | 4.0E+05 | -2.9        |
| PE36a:1-H+AgCl                        | 886.4283           | 886.4285           | 2.4E+04 | 0.3         |
| ST 24:1/d18:2-H                       | 886.6084           | 886.6054           | 4.0E+04 | -3.3        |
| ST 24:1/d18:1 or 24:0/18:2 -H         | 888.6240           | 888.6214           | 2.8E+05 | -3.0        |
| PA 40:6-H+AgCl                        | 889.3704           | 889.3692           | 6.0E+02 | -1.3        |
| ST 24:0/d18:1-H                       | 890.6397           | 890.6371           | 1.4E+05 | -2.9        |
| PE 38p:4-H+AgCl                       | 892.4177           | 892.4131           | 5.1E+02 | -5.2        |
| ST 24:1(OH)/d18:2-H                   | 902.6033           | 902.6023           | 1.3E+04 | -1.1        |
| PE 38a:6-H+AgCl                       | 904.3813           | 904.3791           | 5.8E+02 | -2.5        |
| ST 24:1(OH)/d18:1 or 24:0(OH)/18:2 -H | 904.6189           | 904.6164           | 1.6E+05 | -2.8        |
| ST 24:0(OH)/d18:1-H                   | 906.6346           | 906.6322           | 1.8E+05 | -2.7        |
| PE 38a:4-H+AgCl                       | 908.4126           | 908.4122           | 1.2E+04 | -0.5        |
| PI 40:6-H                             | 909.5498           | 909.5474           | 1.7E+03 | -2.6        |
| PE 40p:6-H+AgCl                       | 916.4177           | 916.4208           | 7.1E+03 | 3.4         |
| PE 40a:6-H+AgCl                       | 932.4126           | 932.4123           | 1.7E+04 | -0.4        |

**Supplementary table 3: Intensity and coefficient of variation from lipids peak in 4 successive tissue sections sorted by lipids class and cationization**

| <b>Lipid species</b>                 | <b>Lipid assignment</b>           | <b>Exact Mass</b> | <b>CV 25%</b>                   | <b>CV 50%</b> | <b>CV 75%</b> | <b>CV 90%</b> |
|--------------------------------------|-----------------------------------|-------------------|---------------------------------|---------------|---------------|---------------|
| PE(NaK)                              | PE36a:1-H+NaK                     | 806.5073          | 0.2381                          | 0.1567        | 0.1361        | 0.1276        |
|                                      | PE38a:4-H+NaK                     | 828.4916          | (all zeros)                     | 0.1823        | 0.1236        | 0.1186        |
|                                      | PE40a:6-H+NaK                     | 852.4916          | (all zeros)                     | (all zeros)   | 0.1209        | 0.1394        |
| <b>Across PE(NaK) average CV</b>     |                                   |                   |                                 | <b>0.1695</b> | <b>0.1269</b> | <b>0.1285</b> |
| PE(2K)                               | PE36a:1-H+2K                      | 822.4812          | 0.2357                          | 0.1936        | 0.1751        | 0.1678        |
|                                      | PE38a:4-H+2K                      | 844.4656          | 0.2027                          | 0.1531        | 0.1386        | 0.1379        |
|                                      | PE40a:6-H+2K                      | 868.4656          | 0.1647                          | 0.1513        | 0.1437        | 0.1598        |
| <b>Across PE(2K) average CV</b>      |                                   |                   | <b>0.201</b>                    | <b>0.166</b>  | <b>0.1525</b> | <b>0.1552</b> |
| PE(AgK)                              | PE36a:1-H+AgK(Ag109)              | 892.4231          | 0.1667<br>excluding<br>one zero | 0.1462        | 0.1241        | 0.1097        |
|                                      | PE38a:4-H+AgK                     | 912.4069          | 0.1376                          | 0.0907        | 0.0772        | 0.0791        |
|                                      | PE40a:6-H+AgK                     | 936.4069          | 0.1036                          | 0.0958        | 0.0856        | 0.0929        |
| <b>Across PE(AgK) average CV</b>     |                                   |                   | <b>0.136</b>                    | <b>0.1109</b> | <b>0.0956</b> | <b>0.0939</b> |
| GalCer(Na)                           | GalCer C22:0(OH)/d18:1+Na         | 822.643           | (all zeros)                     | (all zeros)   | 0.1758        | 0.1546        |
|                                      | GalCer C24:1(OH)/d18:1+Na         | 848.6586          | (all zeros)                     | 0.1611        | 0.1446        | 0.1391        |
|                                      | GalCer C24:0(OH)/d18:1+Na         | 850.6743          | (all zeros)                     | 0.1474        | 0.1412        | 0.1368        |
| <b>Across GalCer(Na) average CV</b>  |                                   |                   |                                 | <b>0.1542</b> | <b>0.1539</b> | <b>0.1435</b> |
| GalCer(K)                            | GalCer C22:0(OH)/d18:1+K          | 838.6169          | (all zeros)                     | (all zeros)   | 0.088         | 0.144         |
|                                      | GalCer C24:1(OH)/d18:1+K          | 864.6325          | (all zeros)                     | 0.1318        | 0.1274        | 0.1334        |
|                                      | GalCer C24:0(OH)/d18:1+K          | 866.6482          | (all zeros)                     | 0.1242        | 0.119         | 0.1373        |
| <b>Across GalCer(K) average CV</b>   |                                   |                   |                                 | <b>0.128</b>  | <b>0.1115</b> | <b>0.1382</b> |
| GalCer(Ag)                           | GalCer C22:0(OH)/d18:1+Ag (Ag109) | 908.5601          | (all zeros)                     | 0.0502        | 0.034         | 0.0319        |
|                                      | GalCer C24:1(OH)/d18:1+Ag         | 932.5739          | 0.139                           | 0.0389        | 0.0283        | 0.0268        |
|                                      | GalCer C24:0(OH)/d18:1+Ag (Ag109) | 936.5917          | 0.1264                          | 0.0468        | 0.0376        | 0.038         |
| <b>Across GalCer(Ag) average CV</b>  |                                   |                   | <b>0.1328</b>                   | <b>0.0453</b> | <b>0.0333</b> | <b>0.0322</b> |
| Cer(Ag)                              | Cer C18:1/d18:1+Ag                | 670.4323          | (all zeros)                     | (all zeros)   | 0.1295        | 0.1238        |
|                                      | Cer C18:0/d18:1+Ag                | 672.4479          | 0.1622                          | 0.1154        | 0.1056        | 0.1067        |
|                                      | Cer C20:0/d18:1+Ag                | 700.4792          | (all zeros)                     | (all zeros)   | (all zeros)   | 0.1244        |
| <b>Across Cer(Ag) average CV</b>     |                                   |                   |                                 |               | <b>0.1176</b> | <b>0.1183</b> |
| DAG(Ag)                              | DAG 36a:1+Ag                      | 729.4582          | (all zeros)                     | (all zeros)   | 0.0506        | 0.0323        |
|                                      | DAG 38a:4+Ag                      | 751.4425          | (all zeros)                     | (half zeros)  | 0.1267        | 0.0316        |
|                                      | DAG 40a:6+Ag                      | 775.4425          | (all zeros)                     | (all zeros)   | (all zeros)   | 0.0396        |
| <b>Across DAG(Ag) average CV</b>     |                                   |                   |                                 |               | <b>0.0886</b> | <b>0.0345</b> |
| Cer-H2O(Ag)                          | Cer C18:1/d18:1-H2O+Ag            | 652.4223          | 0.1191<br>excluding<br>one zero | 0.095         | 0.0812        | 0.0806        |
|                                      | Cer C18:0/d18:1-H2O+Ag            | 656.4384          | 0.0943                          | 0.0641        | 0.0507        | 0.0441        |
|                                      | Cer C24:1/d18:1-H2O+Ag            | 736.5162          | (all zeros)                     | 0.0972        | 0.0711        | 0.0557        |
| <b>Across Cer-H2O(Ag) average CV</b> |                                   |                   | <b>0.1067</b>                   | <b>0.0854</b> | <b>0.0677</b> | <b>0.0601</b> |

**Supplementary figure 1:** Positive ion mode spectra of lipid standards on rat brain tissue implanted with AgNP and MALDI images extracted from one of the major cationization

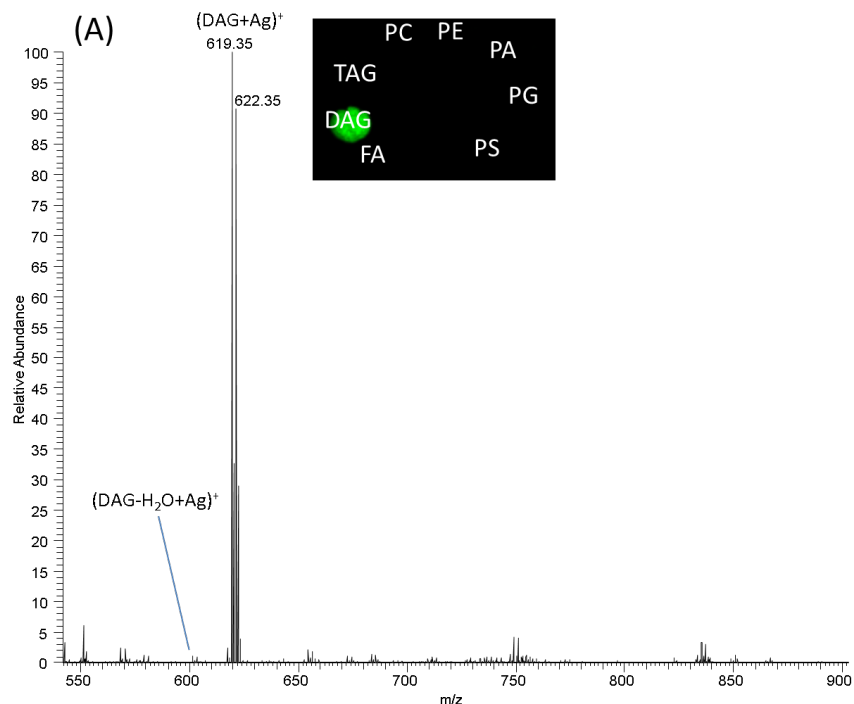

**Supplementary figure 1A:** Positive ion mode spectra of DAG standard on rat brain tissue implanted with AgNP and MALDI images extracted for the m/z 619.35 corresponding to DAG(28:0)+Ag.

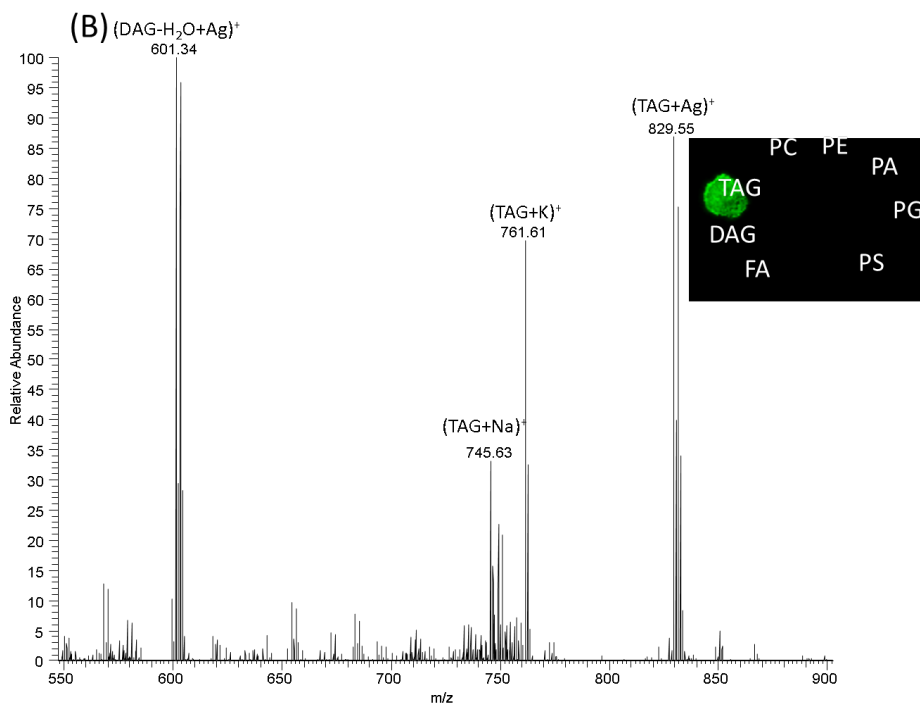

**Supplementary figure 1B:** Positive ion mode spectra of TAG standard on rat brain tissue implanted with AgNP and MALDI images extracted for the m/z 829.55 corresponding to TAG(42:0)+Ag.

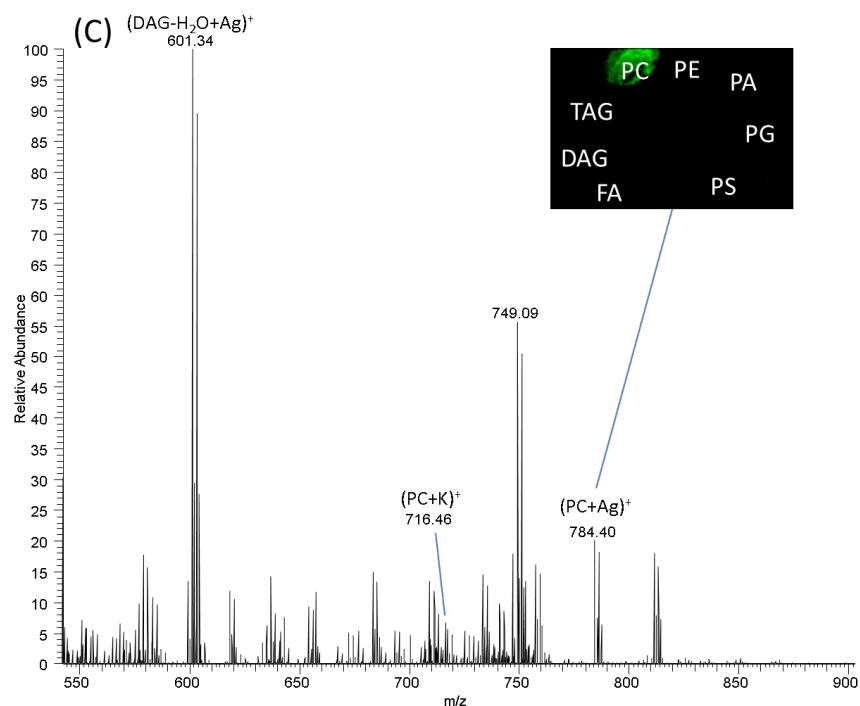

**Supplementary figure 1C:** Positive ion mode spectra of PC standard on rat brain tissue implanted with AgNP and MALDI images extracted for the m/z 784.40 corresponding to PC(28:0)+Ag.

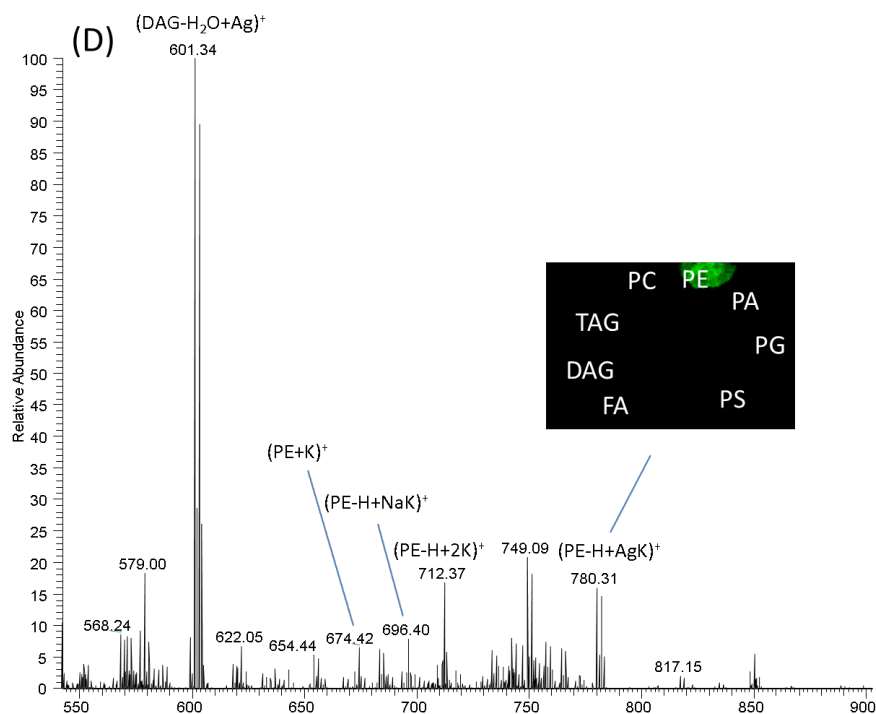

**Supplementary figure 1D:** Positive ion mode spectra of PE standard on rat brain tissue implanted with AgNP and MALDI images extracted for the m/z 780.31 corresponding to PE(28:0)-H+AgK.

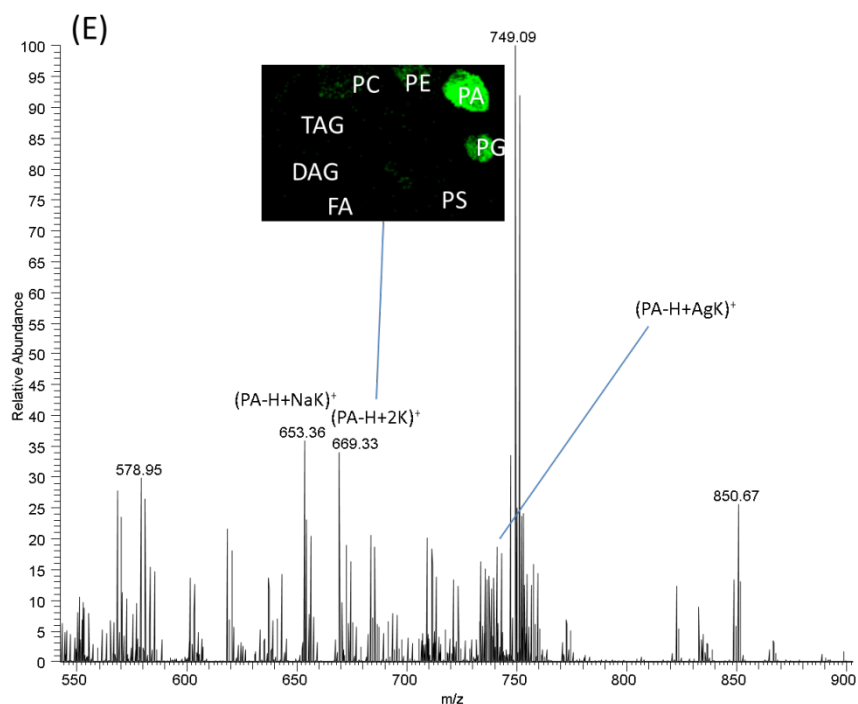

**Supplementary figure 1E:** Positive ion mode spectra of PA standard on rat brain tissue implanted with AgNP and MALDI images extracted for the  $m/z$  669.33 corresponding to PA (28:0)-H+2K. This peak is present in PA, PG, PE and at low intensity in PC.

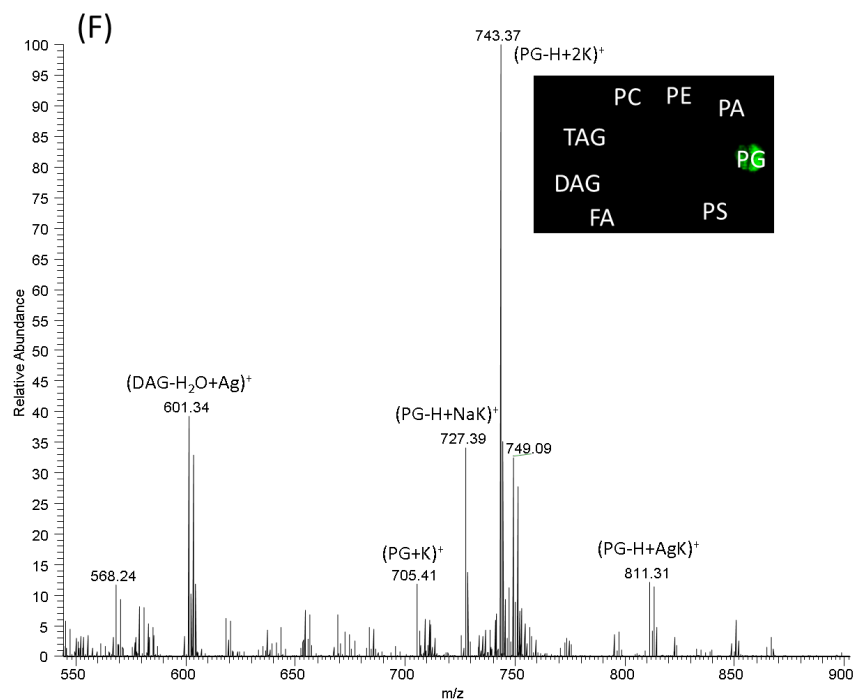

**Supplementary figure 1F:** Positive ion mode spectra of PG standard on rat brain tissue implanted with AgNP and MALDI images extracted for the  $m/z$  743.37 corresponding to PG (28:0)-H+2K.



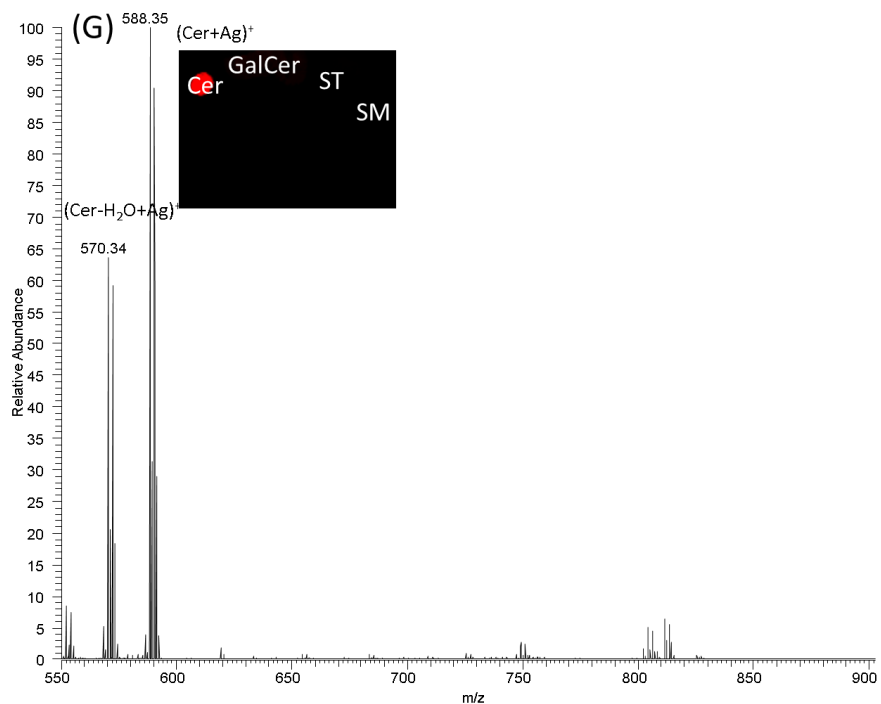

**Supplementary figure 1G:** Positive ion mode spectra of Cer standard on rat brain tissue implanted with AgNP and MALDI images extracted for the m/z 588.35 corresponding to Cer(12:0/d18:1)+Ag.

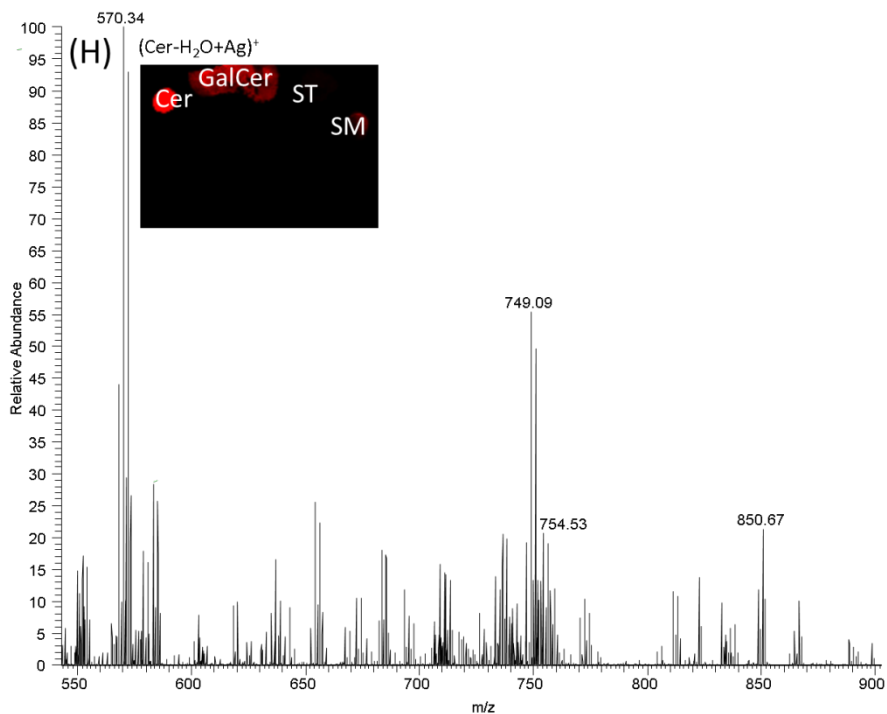

**Supplementary figure 1H:** Positive ion mode spectra of SM standard on rat brain tissue implanted with AgNP and MALDI images extracted for the m/z 570.34 corresponding to Cer(12:0/d18:1)-H<sub>2</sub>O+Ag. This peak is present in Cer, Galcer and SM.

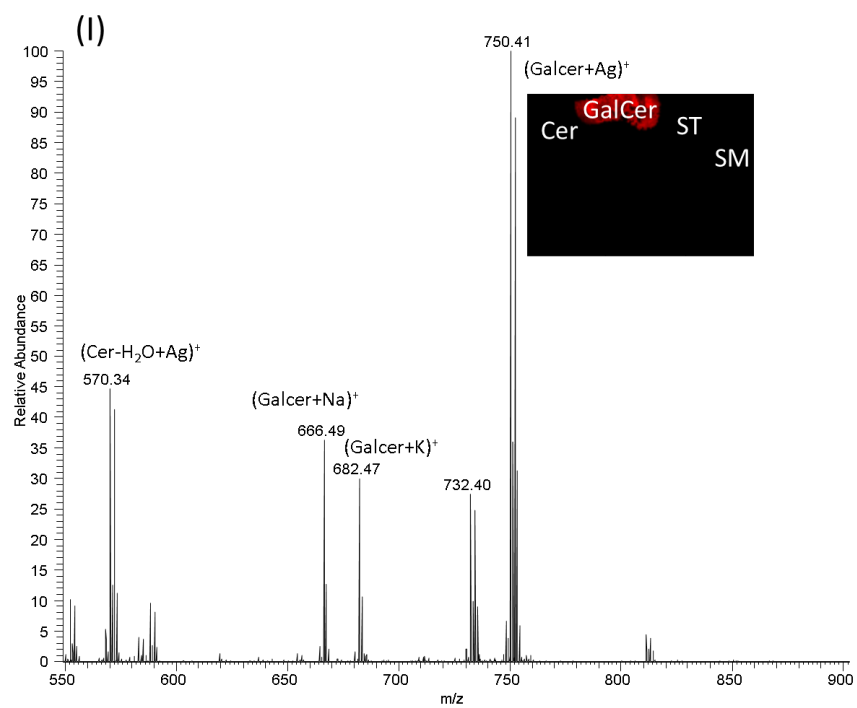

Supplementary figure 1: Positive ion mode spectra of Galcer standard on rat brain tissue implanted with AgNP and MALDI images extracted for the m/z 750.41 corresponding to Galcer(12:0/d18:1)+Ag.

**Supplementary figure 2:** Negative ion mode spectra of standard on rat brain tissue implanted with AgNP and MALDI images extracted from deprotonated ion

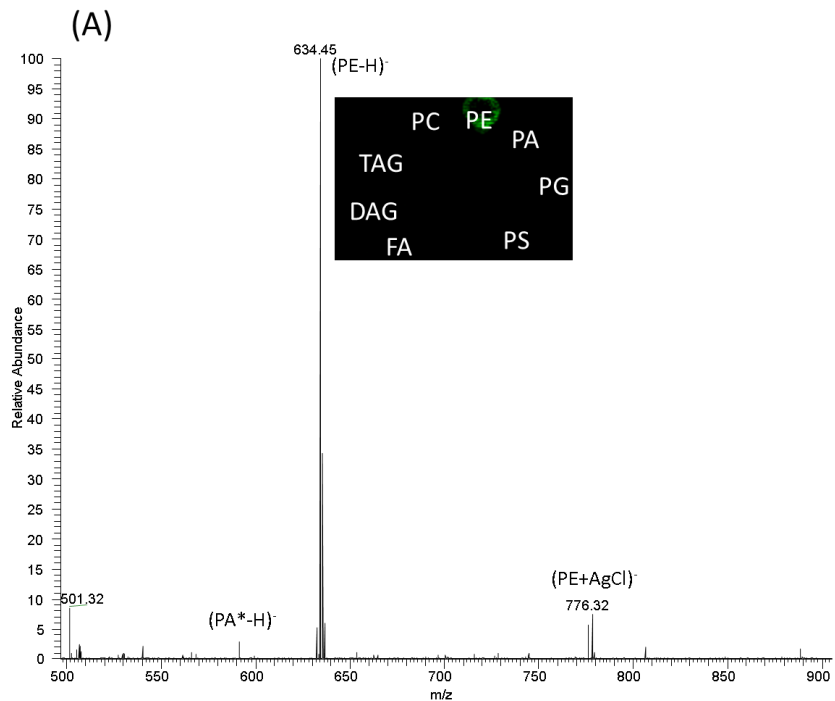

**Supplementary figure 2A:** Negative ion mode spectra of PE standard on rat brain tissue implanted with AgNP and MALDI images extracted for the m/z 634.45 corresponding to PE(28:0)-H. PA\* can also correspond to fragment of other phospholipids.

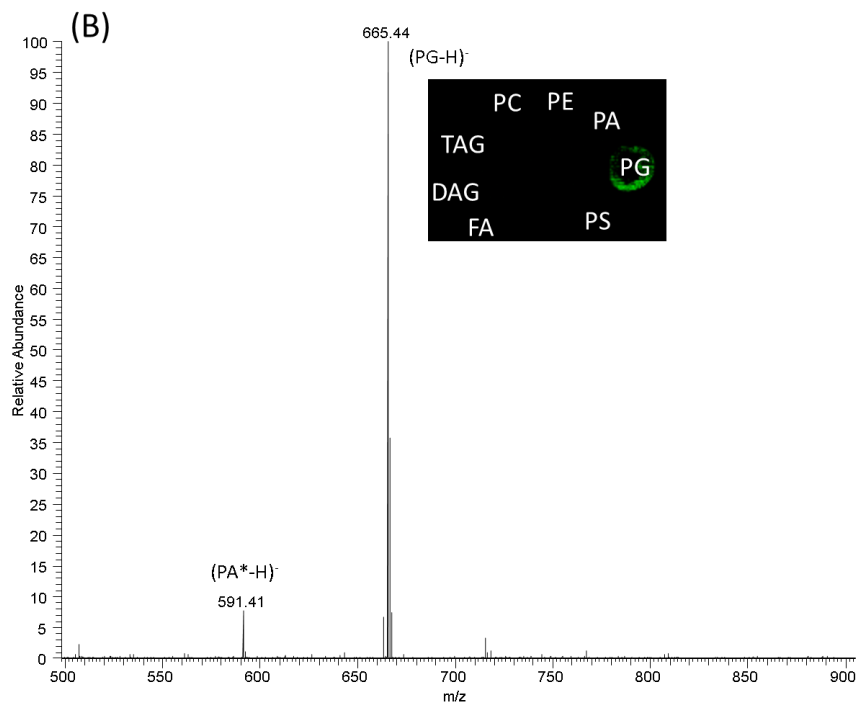

**Supplementary figure 2B:** Negative ion mode spectra of PG standard on rat brain tissue implanted with AgNP and MALDI images extracted for the m/z 665.44 corresponding to PG(28:0)-H. PA\* can also correspond to fragment of other phospholipids.

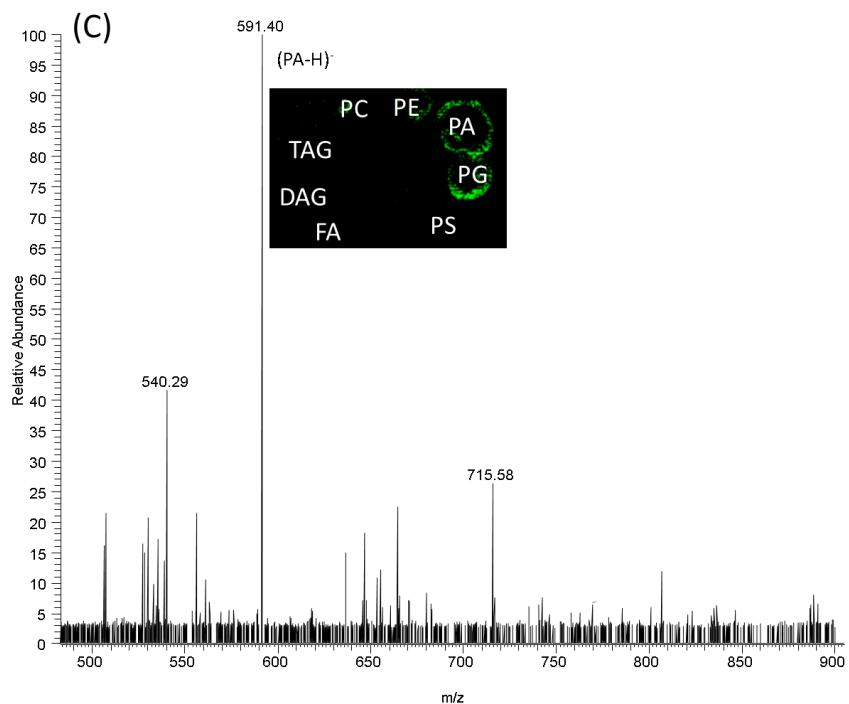

**Supplementary figure 2C:** Negative ion mode spectra of PA standard on rat brain tissue implanted with AgNP and MALDI images extracted for the  $m/z$  665.44 corresponding to PA(28:0)-H. This peak is present in PG, PA, and at low intensity in PE and PC.

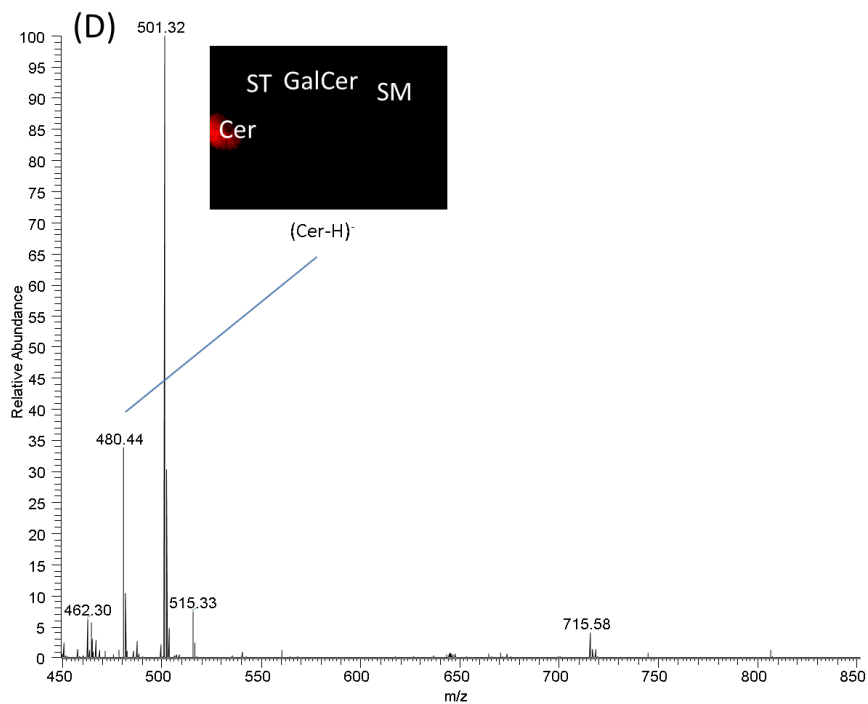

**Supplementary figure 2D:** Negative ion mode spectra of Cer standard on rat brain tissue implanted with AgNP and MALDI images extracted for the  $m/z$  480.44 corresponding to Cer(12:0/d18:1)-H.

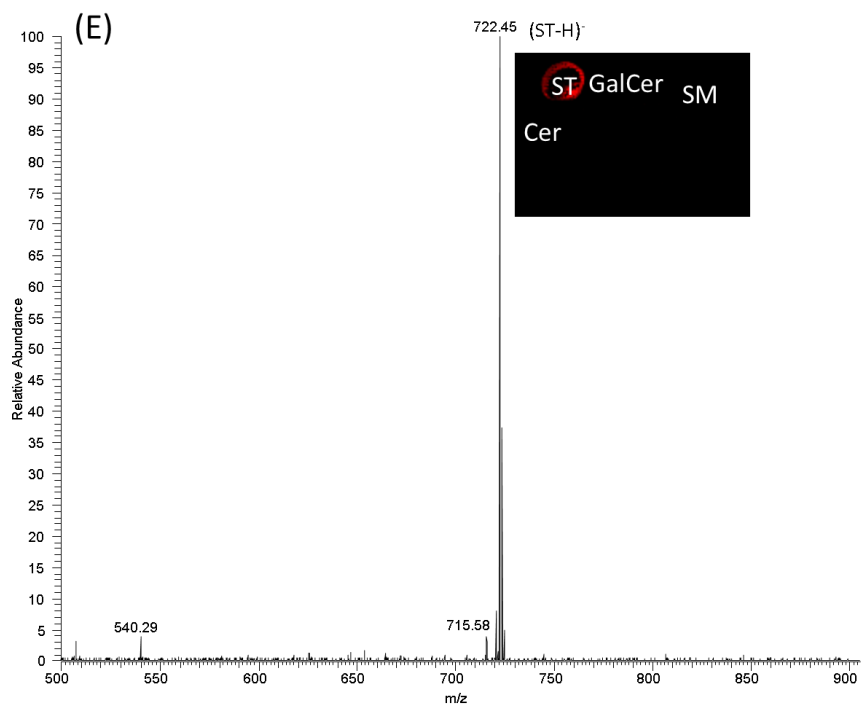

Supplementary figure 2E: Negative ion mode spectra of ST standard on rat brain tissue implanted with AgNP and MALDI images extracted for the  $m/z$  480.44 corresponding to ST(12:0/d18:1)-H.

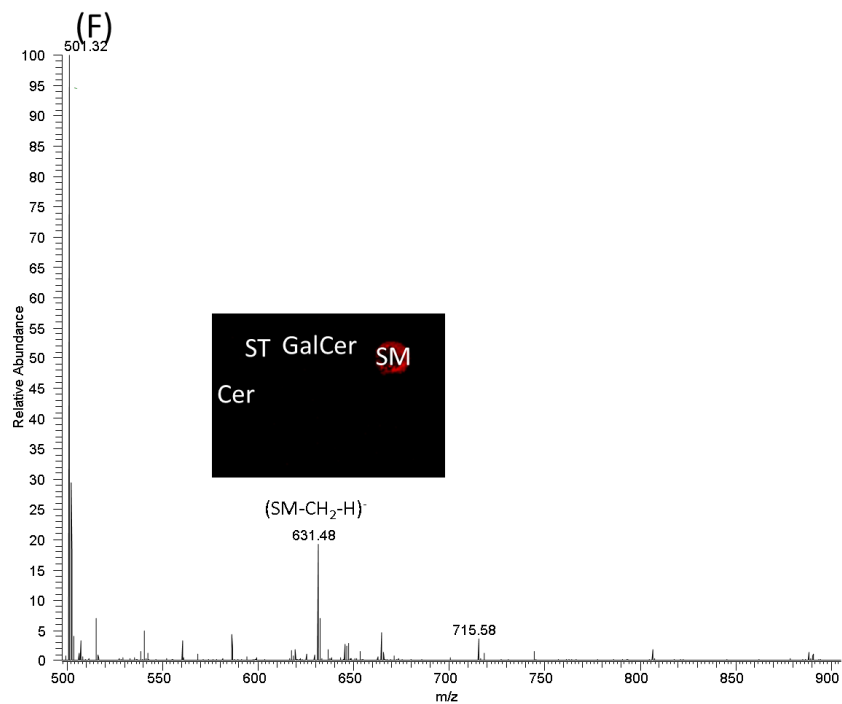

Supplementary figure 2F: Negative ion mode spectra of SM standard on rat brain tissue implanted with AgNP and MALDI images extracted for the  $m/z$  480.44 corresponding to SM(12:0/d18:1)-CH<sub>2</sub>-H.

Supplementary figure 3: MALDI images in negative ion mode from deposited lipids on a rat brain section, the image has been extracted for the  $m/z$  227.2006 corresponding to Myristic Acid(14:0)-H. This image shows that this peak can be produced by several lipid standards

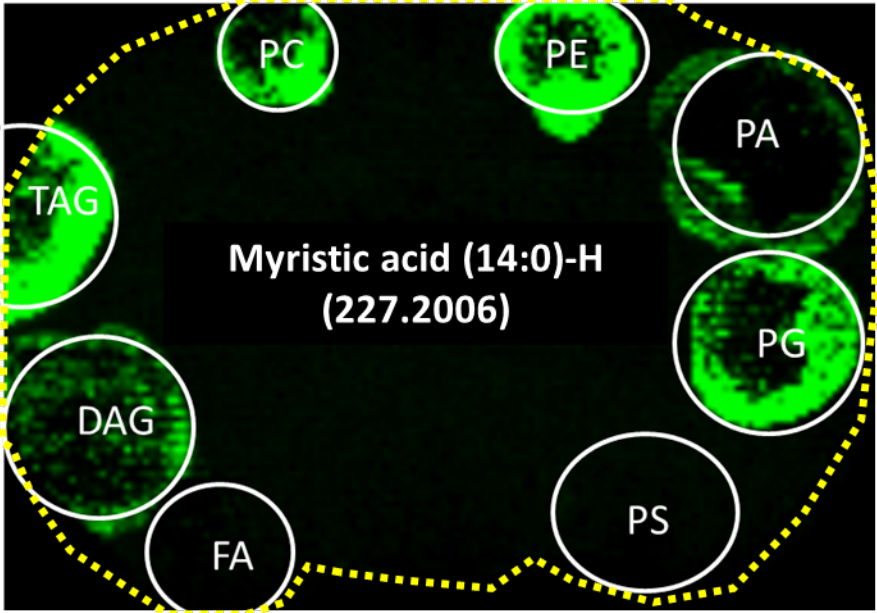

Supplementary figure 4: MALDI images extracted for all lipids species identified in positive and negative ion mode. In positive ion mode all images shown are produced from silver cationization while in negative ion mode they are produced from M-H peak except for SM in which M-H-CH<sub>2</sub> was used.

Ceramides (Cer)  
Positive ion mode  
(M+Ag)<sup>+</sup>

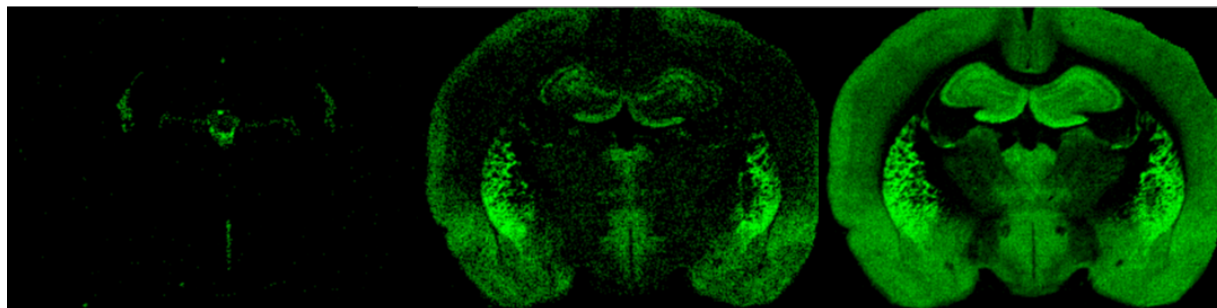

**Cer C16:0/d18:1  
644.42**

**Cer C18:1/d18:1  
or C18:0/d18:2  
670.43**

**Cer C18:0/d18:1  
672.45**

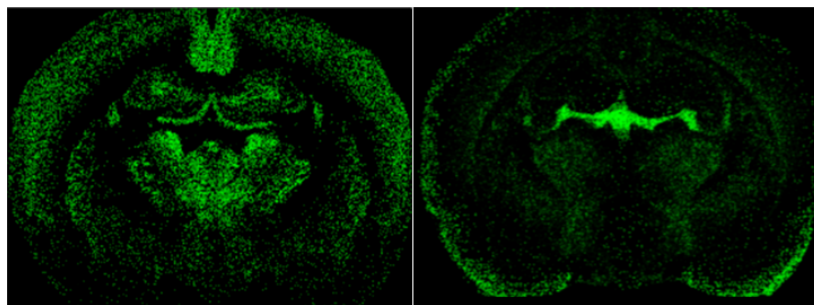

**Cer C20:0/d18:1  
700.48**

**Cer C24:0/d18:1  
756.54**

Diacylglycerols (DAG)  
Positive ion mode  
(M+Ag)<sup>+</sup>

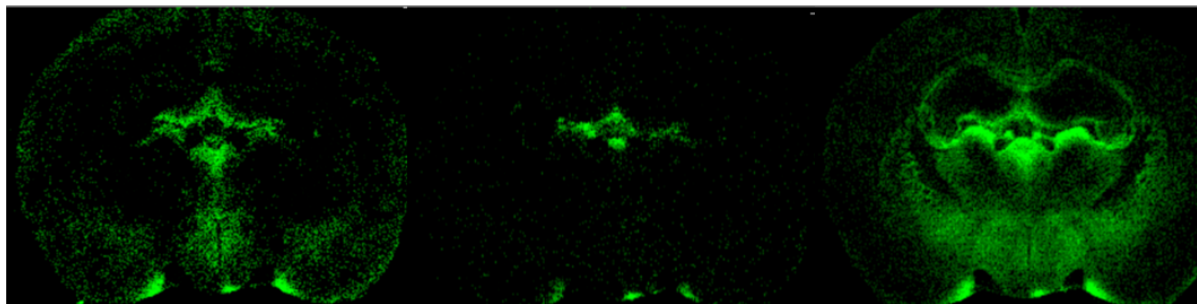

**DAG 32a:0**  
**675.41**

**DAG 34a:0**  
**699.41**

**DAG 34a:1**  
**701.43**

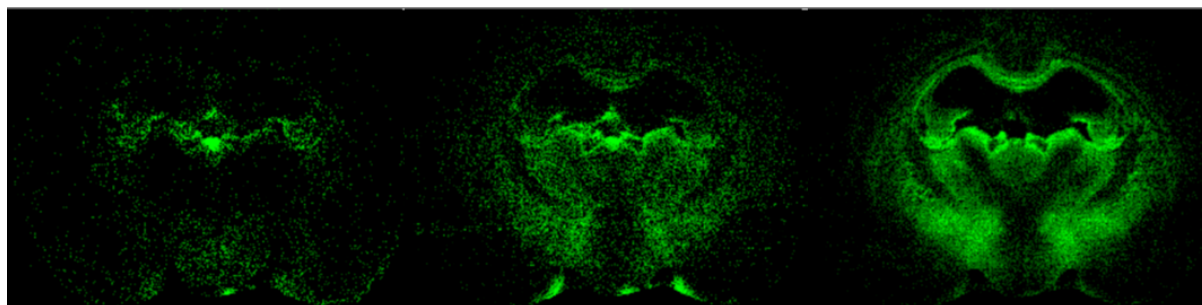

**DAG 36a:4**  
**723.41**

**DAG 36a:2**  
**727.44**

**DAG 36a:1**  
**729.46**

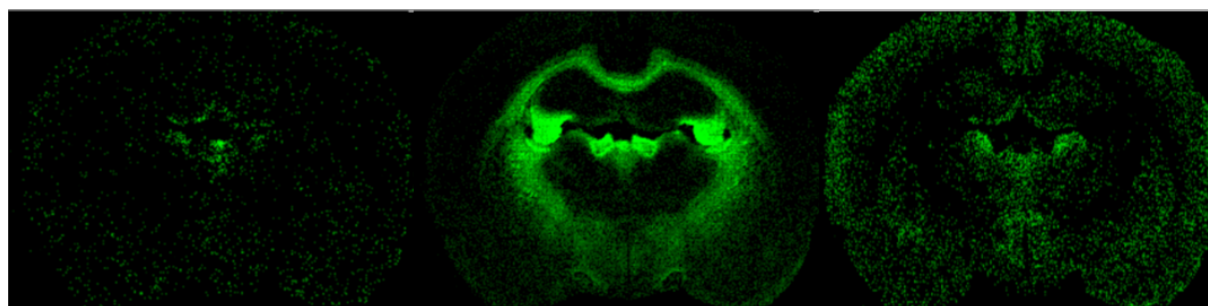

**DAG 38a:6**  
**747.41**

**DAG 38a:4**  
**751.44**

**DAG 40a:6**  
**775.44**



Galactoceramides (GalCer)  
Positive ion mode  
(M+Ag)<sup>+</sup>

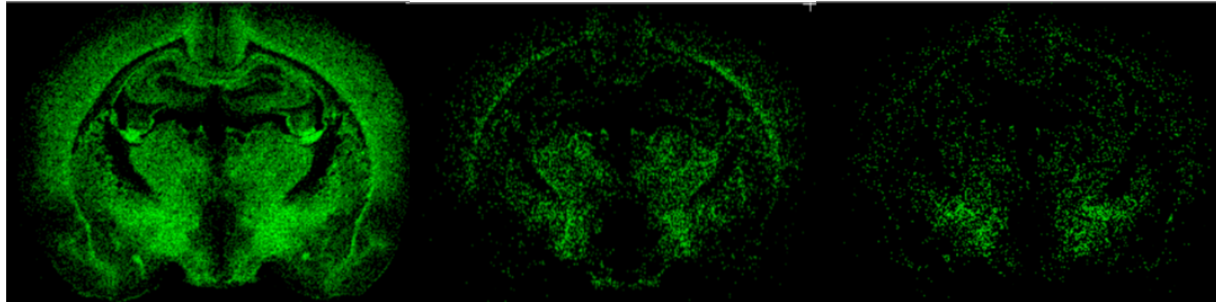

Galcer C18:0/d18:1  
834.50

Galcer C20:0/d18:1  
862.53

Galcer C20:0/d18:1(OH)  
878.53

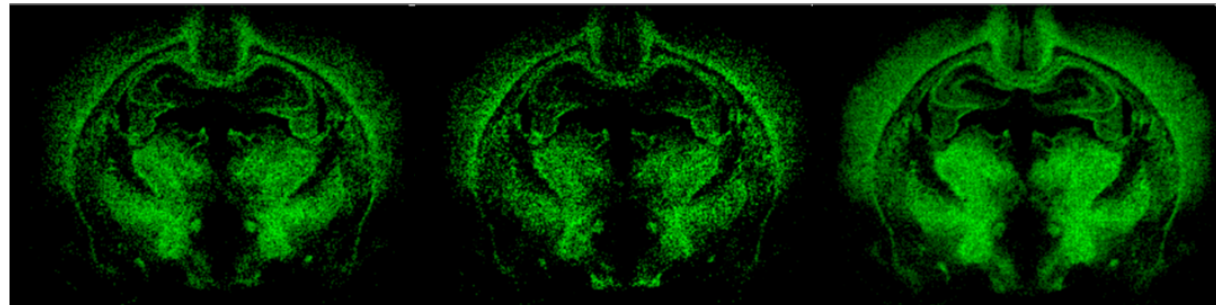

Galcer C22:1/d18:1  
or C22:0/d18:2  
888.55

GalCer C22:0/d18:1  
890.56

Galcer C22:1(OH)/d18:1  
or C22:0(OH)/d18:2  
904.54

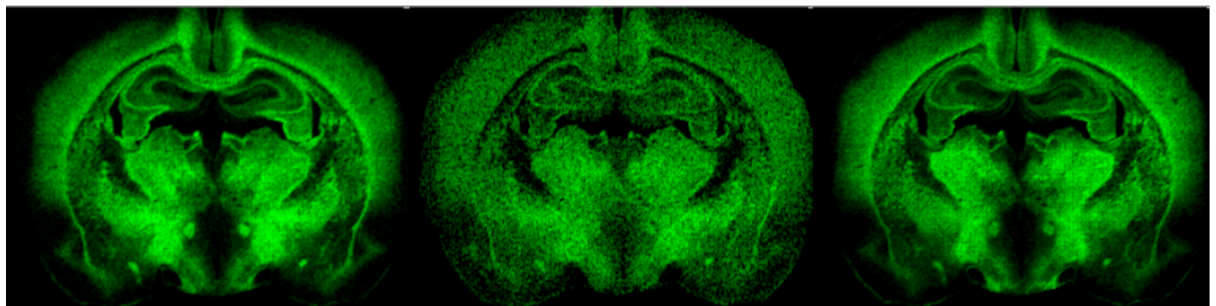

Galcer C22:0(OH)/d18:1  
906.56

Galcer C24:1/d18:2  
914.56

Galcer C24:1/d18:1  
or C24:0/d18:2  
916.58

Galactoceramides (GalCer)  
Positive ion mode  
(M+Ag)<sup>+</sup>

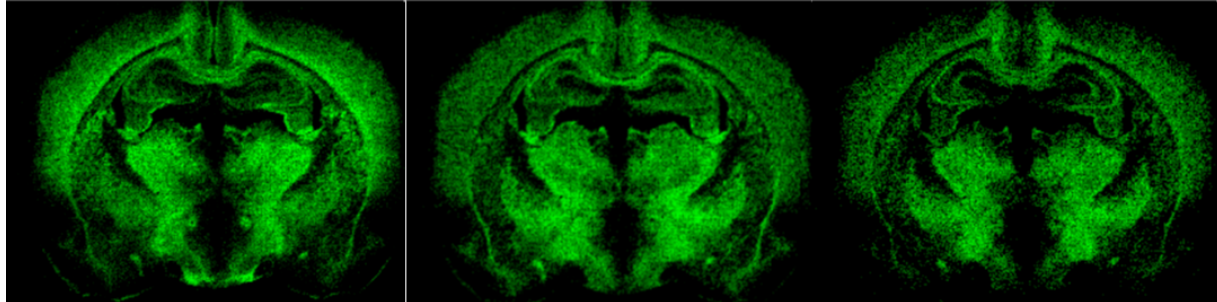

GalCer C24:0/d18:1  
918.59

Galcer C23:0(OH)/d18:1  
920.57

Galcer C24:1(OH)/d18:2  
930.56

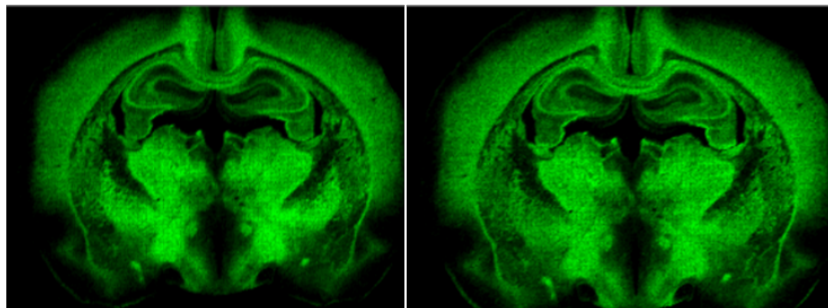

Galcer C24:1(OH)/d18:1  
or C24:0(OH)/d18:2  
932.57

Galcer C24:0(OH)/d18:1  
934.59

Cholesterol and cholesterol ester (CE)  
Positive ion mode  
 $M+(Ag)_3^+$  or  $(M+Ag)^+$

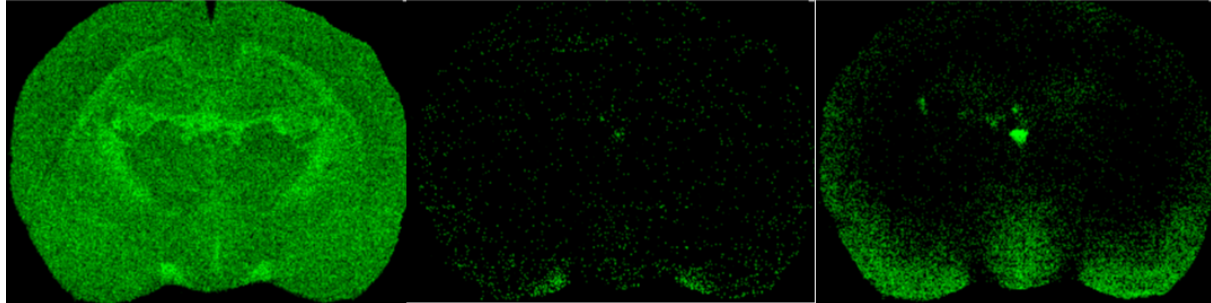

**Cholesterol (Ag)<sub>3</sub>**  
**707.07**

**CE C16:0**  
**731.49**

**CE C20:4**  
**779.49**

Phosphatidylcholine (PC)  
Positive ion mode  
 $(M+Ag)^+$

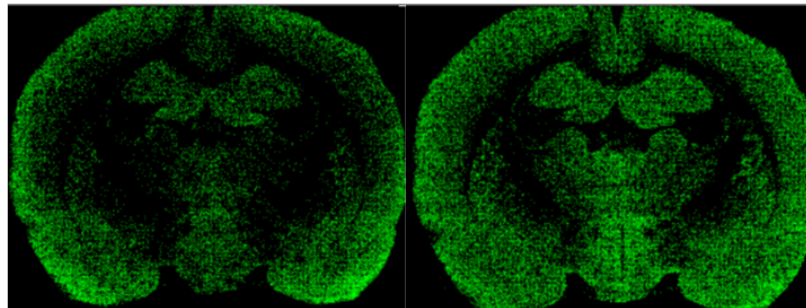

**PC 32a:0**  
**840.47**

**PC 34a:1**  
**866.48**

Sphingomyelin (SM)  
Negative ion mode  
(M-CH<sub>2</sub>-H)<sup>-</sup>

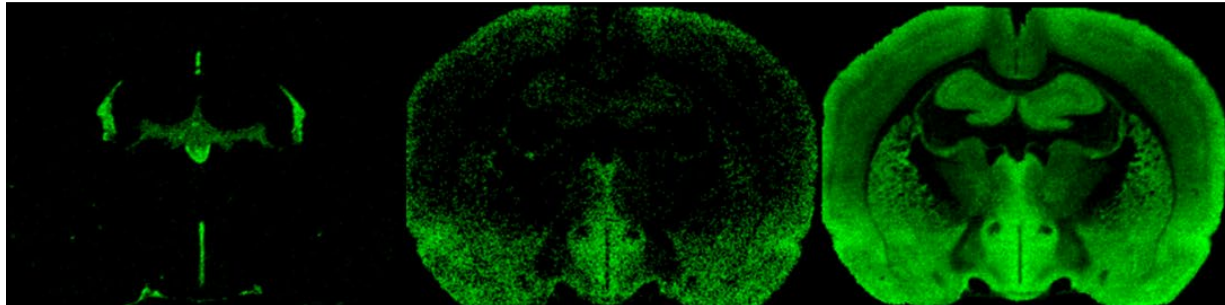

**SM C16:0/d18:1**  
**687.54**

**SM C18:1/d18:1**  
**or C18:0/d18:2**  
**713.56**

**SM C18:0/d18:1**  
**715.58**

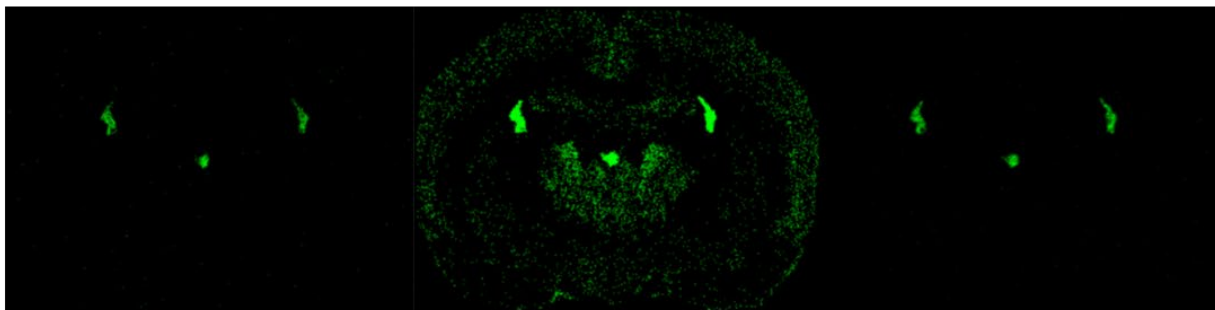

**SM C20:1/d18:1**  
**741.59**

**SM C20:0/d18:1**  
**743.60**

**SM C22:1/d18:1**  
**or C22:0/d18:2**  
**769.62**

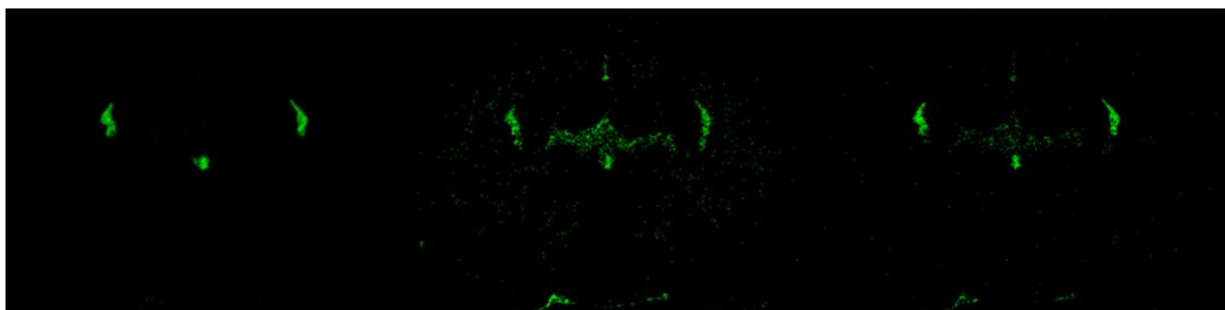

**SM C22:0/d18:1**  
**771.64**

**SM C24:1/d18:1**  
**or C24:0/d18:2**  
**797.65**

**SM C24:0/d18:1**  
**799.67**

Sulfatide (ST)  
Negative ion mode  
(M-H)<sup>-</sup>

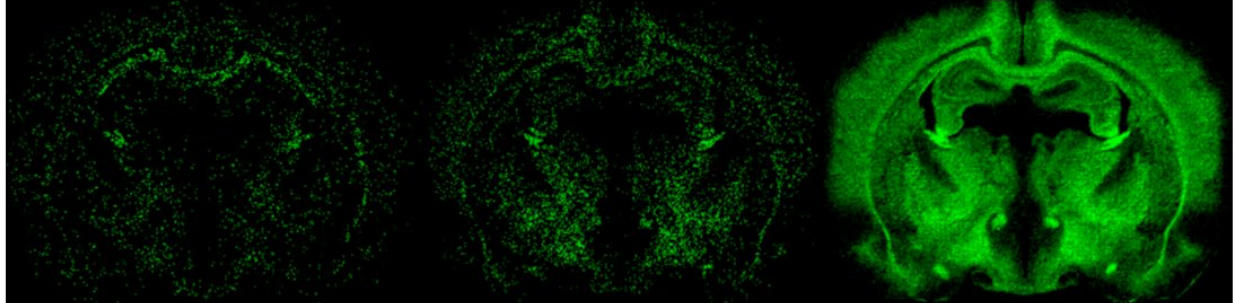

ST C16:0/d18:1  
778.51

ST C18:1/d18:1  
or C18:0/d18:2  
804.53

ST C18:0/d18:1  
806.54

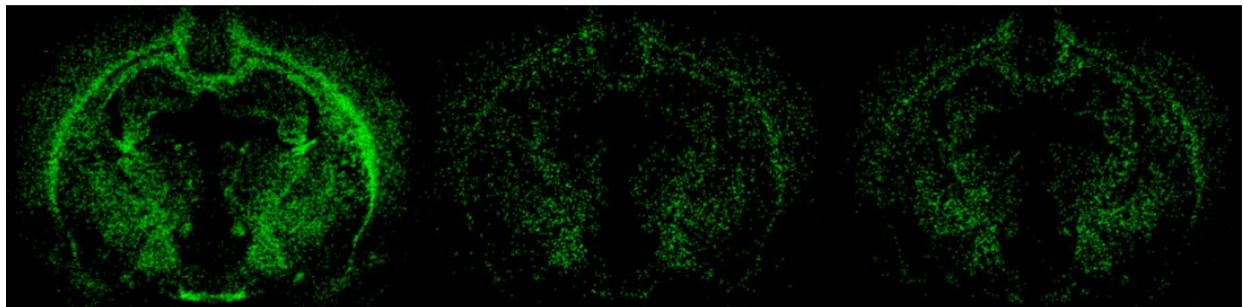

ST C18:0(OH)/d18:1  
822.54

ST C20:0/d18:1  
834.57

ST C22:1/d18:1  
or C22:0/d18:2  
860.59

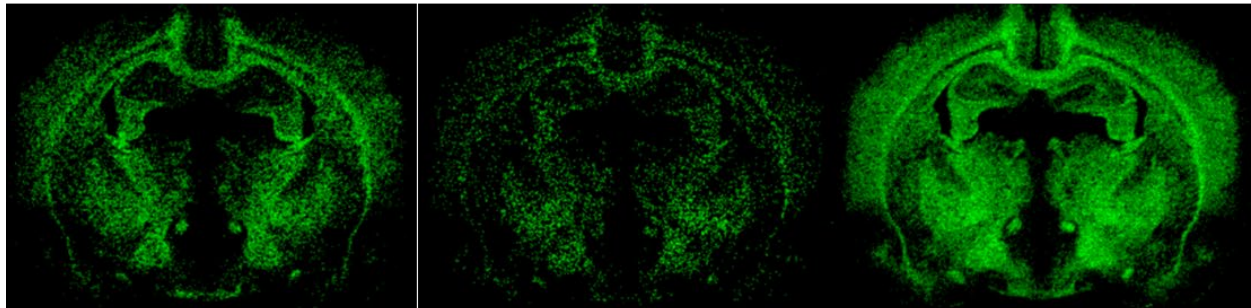

ST C22:0/d18:1  
862.61

ST C22:1(OH)/d18:1  
Or C 22:0(OH)/d18:2  
876.58

ST C22:0(OH)/d18:1  
878.60

Sulfatide (ST)  
Negative ion mode  
(M-H)<sup>-</sup>

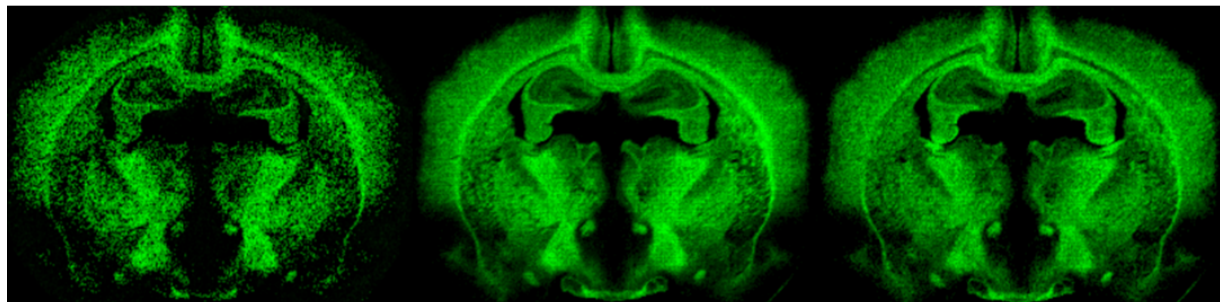

ST C24:1/d18:2  
886.60

ST C24:1/d18:1  
or C24:0/d18:2  
888.62

ST C24:0/d18:1  
890.63

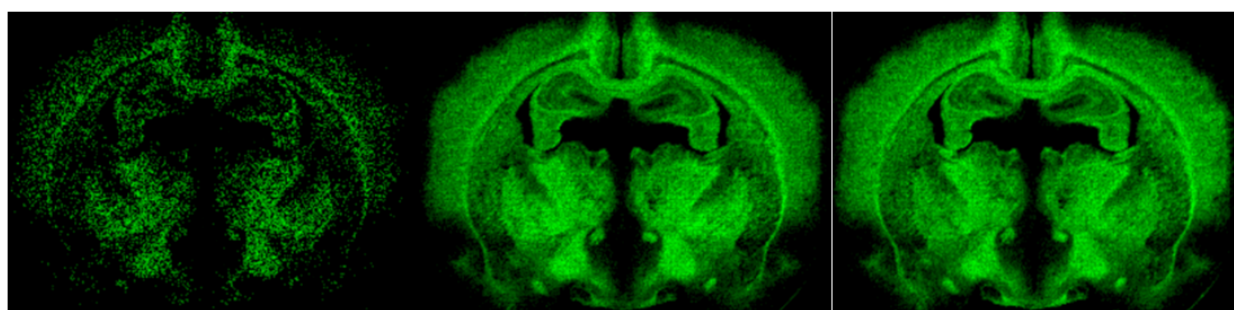

ST C24:1(OH)/d18:2  
902.60

ST C24:1(OH)/d18:1  
Or C24:0(OH)/d18:2  
904.62

ST C24:0(OH)/d18:1  
906.63

Phosphatidylethanol (PE)  
Negative ion mode  
(M-H)<sup>-</sup>

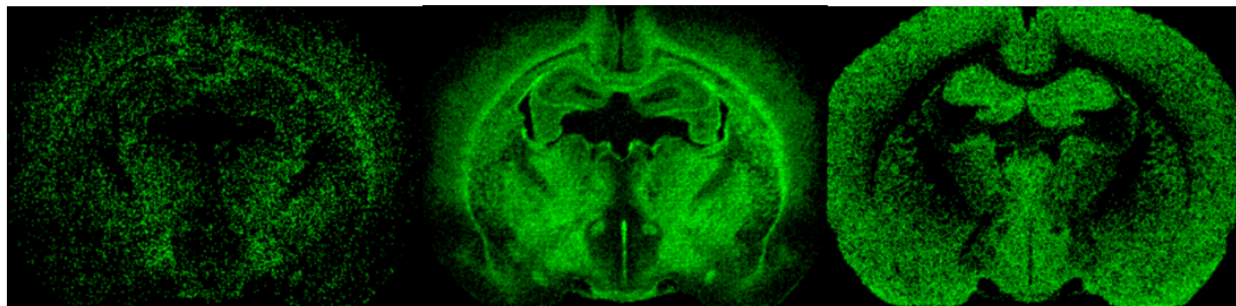

**PE 34p:1**  
700.52

**PE 34p:0**  
702.54

**PE 34a:1**  
716.52

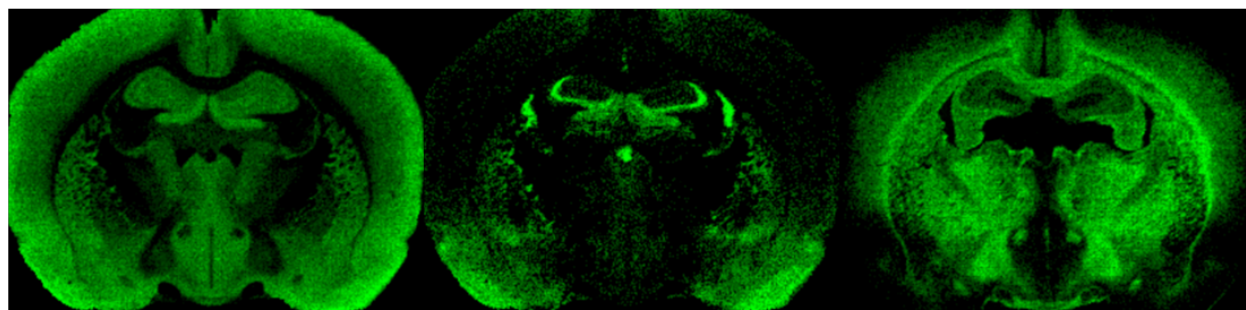

**PE 34a:0**  
718.54

**PE 36p:4**  
722.51

**PE 36p:2**  
726.54

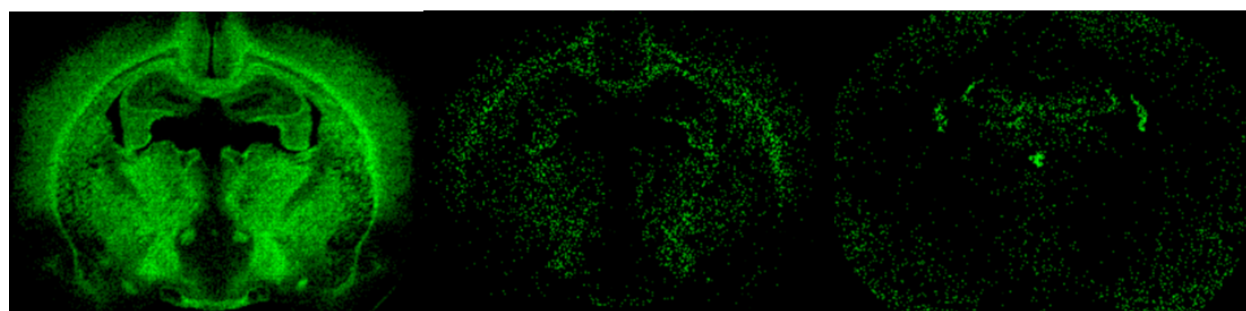

**PE 36p:1**  
728.56

**PE 36p:0**  
730.58

**PE 36a:4**  
738.51

Phosphatidylethanol (PE)  
Negative ion mode  
(M-H)<sup>-</sup>

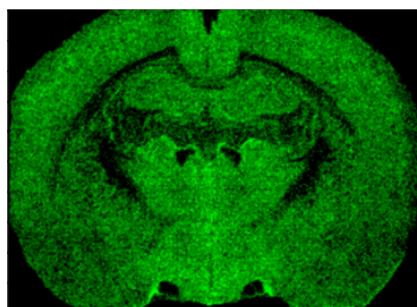

**PE 36a:2**  
**742.54**

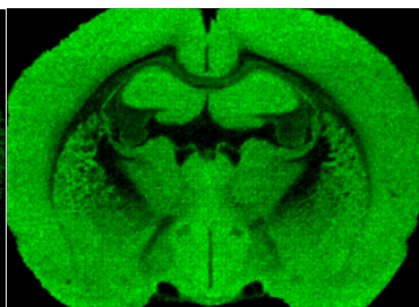

**PE 36a:1**  
**744.55**

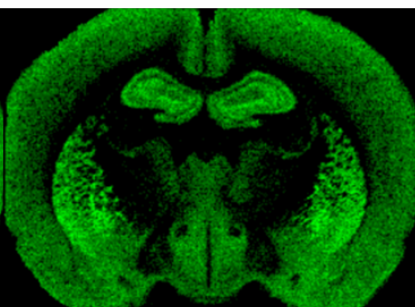

**PE 38p:6**  
**746.51**

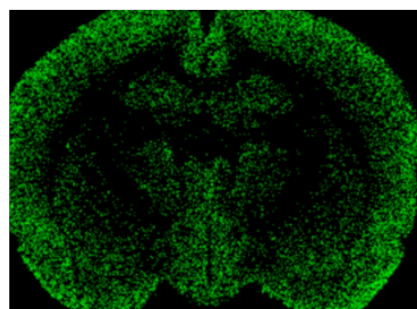

**PE 36a:0**  
**746.57**

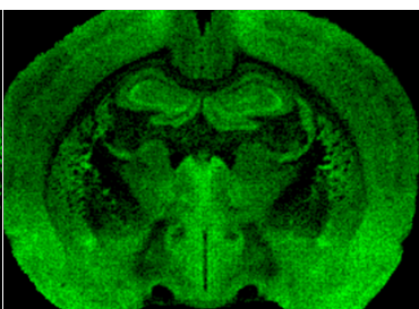

**PE 38p:4**  
**750.54**

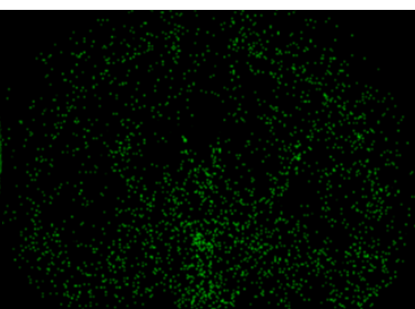

**PE 38p:3**  
**752.56**

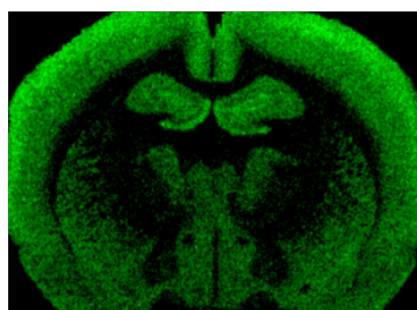

**PE 38a:6**  
**762.51**

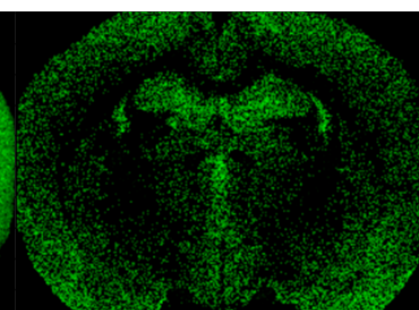

**PE 38a:5**  
**764.52**

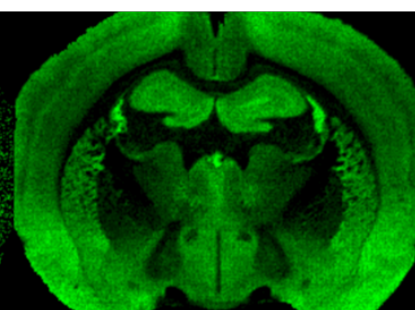

**PE 38a:4**  
**766.54**



Phosphatidylethanol (PE)  
Negative ion mode  
(M-H)<sup>-</sup>

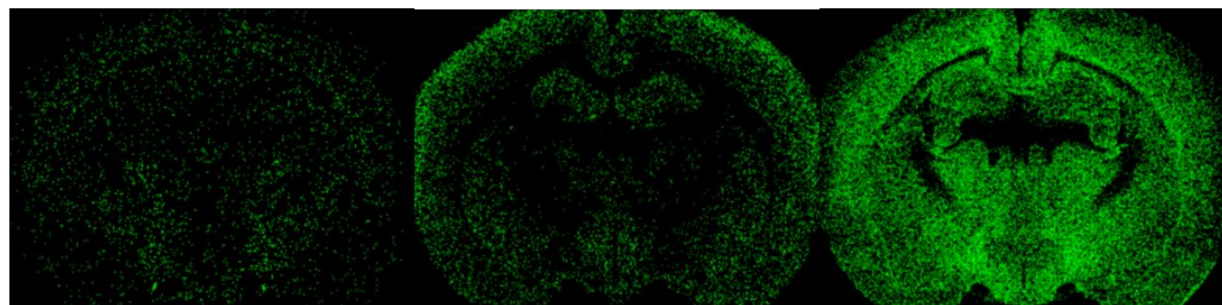

PE 38a:2  
770.52

PE 40p:7  
772.53

PE 38a:1  
772.59

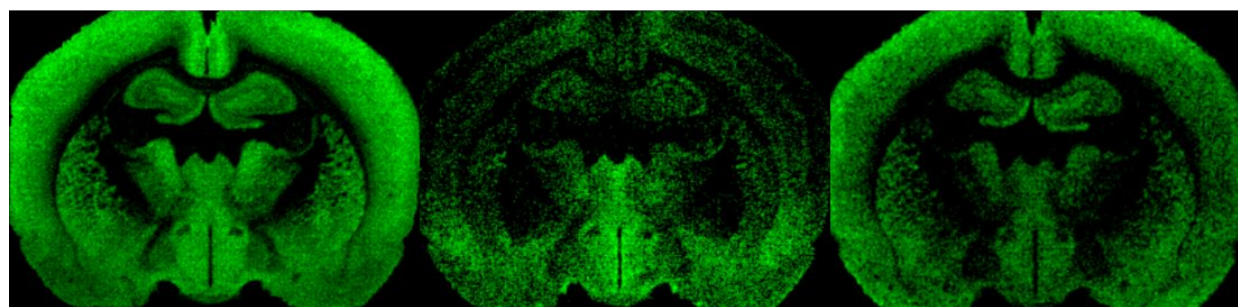

PE 40p:6  
774.54

PE 40p:4  
778.58

PE 40a:7  
788.52

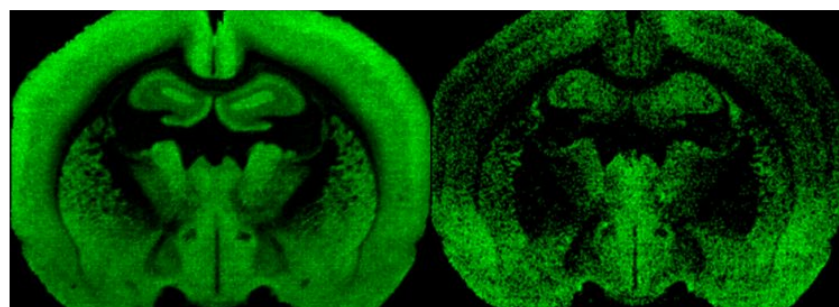

PE 40a:6  
790.54

PE 40a:4  
794.57

Phosphatidylinositol (PI)  
Negative ion mode  
(M-H)<sup>-</sup>

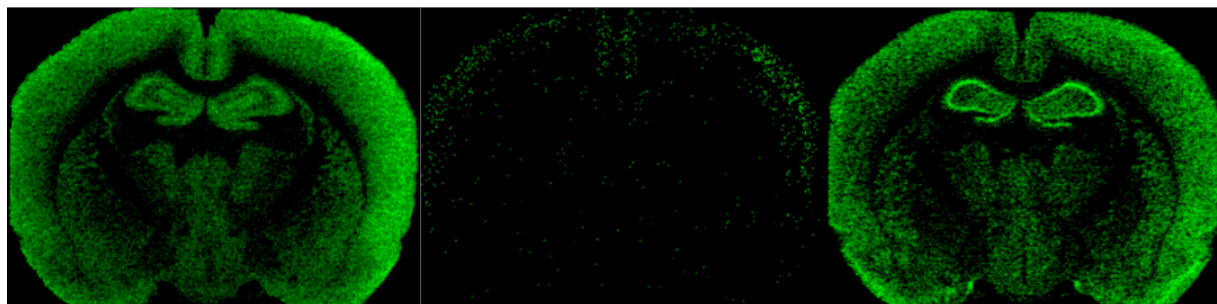

PI 36:4  
857.52

PI 38:6  
881.52

PI 38:5  
883.53

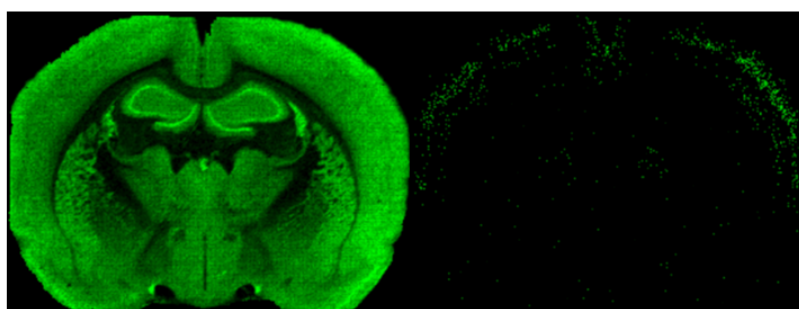

PI 38:4  
885.55

PI 40:6  
909.54

Supplementary figure 5: MALDI average mass spectrum from a serial rat section, acquired in negative ion mode on a MALDI-LTQ-Orbitrap-XL with silver nanoparticles matrices.

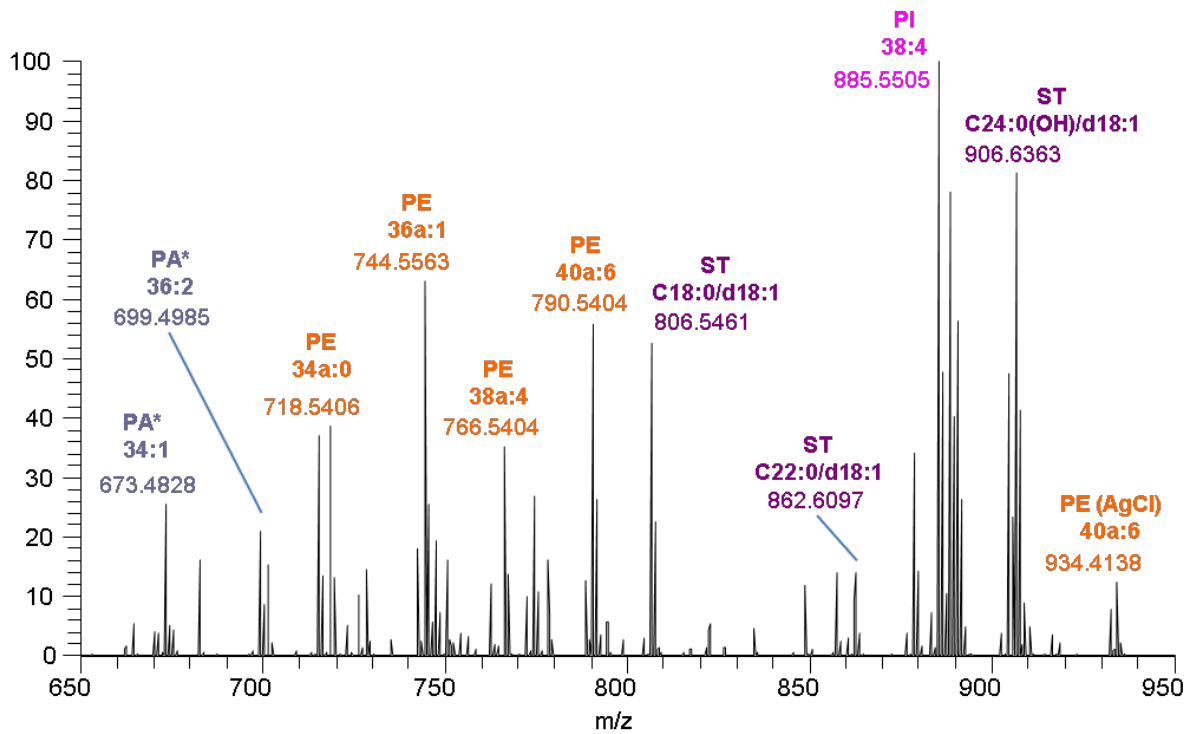

PA\* can also correspond to fragment of other phospholipids

Supplementary figure 6: Distribution of ceramides by mass imaging of a rat at brain section level -2.0 mm re:Bregma in positive ion mode. Images were extracted for m/z (A) 756.5420 corresponding to Cer 20:0/d18:1+Ag, (B) 672.4479 corresponding to Cer 18:0/d18:1+Ag and (C) Combo plot of both ceramides Cer 20:0/d18:1+Ag (red) and Cer 18:0/d18:1+Ag (green). Microscope image (D) before and (E) after implantation

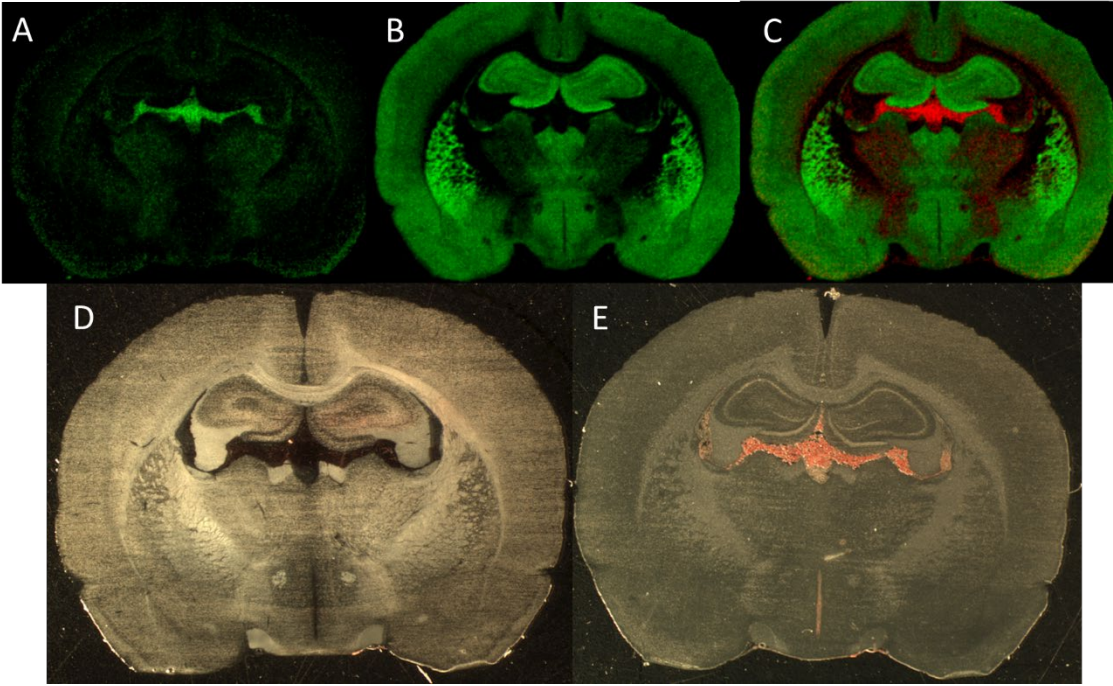

Supplementary figure 7: Distribution of ceramides by mass imaging at level -3.2 mm re:Bregma in positive ion mode in a rat brain section, resolution 100,000 at 400 u. Images were extracted for m/z (A) 644.4166 corresponding to Cer 16:0/d18:1+Ag, (B) 670.4323 Cer 18:1/d18:1+Ag (C) 672.4479 corresponding to Cer 18:0/d18:1+Ag and (D) 700.4792 corresponding to Cer 20:0/d18:1+Ag.

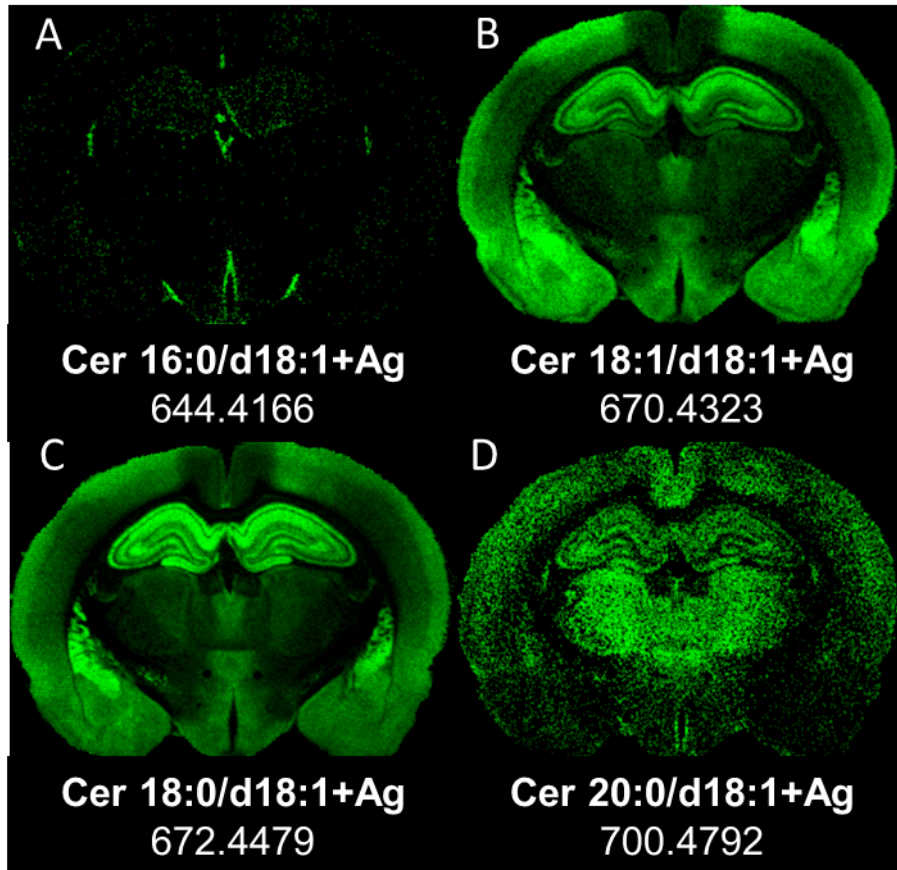

Supplement: NIHMS1776645-supplement-Supplemental_Data.pdf [file NIHMS1776645-supplement-Supplemental_Data.pdf]
